# Supplementary material for: Defect formation and carrier compensation in layered oxychalcogenide La2CdO2Se2: an insight from first principles
Source: Royal Society of Chemistry journal article supplement (doi:10.1039/d2tc03836f), 2022-01-01
Supplement: d2tc03836f1.pdf [file d2tc03836f1.pdf]

## Supplementary Information

# Defect formation and carrier compensation in layered oxychalcogenide $\text{La}_2\text{CdO}_2\text{Se}_2$ : an insight from first principles

Tomoya Gake, Yu Kumagai, Akira Takahashi, Hidenori Hiramatsu, and Fumiyasu Oba\*

Laboratory for Materials and Structures, Institute of Innovative Research, Tokyo Institute of Technology, Yokohama 226-8503, Japan.

## Computational details for zb-CdSe

The bulk and defect calculations for zb-CdSe were conducted using the HSE06 hybrid functional. The PAW cut-off radii were set to 1.22 and 1.11 Å for Cd and Se, respectively; Cd 4d and 5s and Se 4s and 4p were treated as valence electrons. The lattice constant of the zb-CdSe primitive unit cell was relaxed until the residual stress was convergence to 0.005 GPa. A  $\Gamma$ -centered  $6\times 6\times 6$   $k$ -point mesh and a plane-wave cut-off energy of 520 eV were used for the structural optimization. The band structure and DOS were evaluated using a cut-off energy of 400 eV under the optimized structure. For the DOS calculation, a  $\Gamma$ -centered  $k$ -point mesh of  $12\times 12\times 12$  was employed with a reduced mesh by a factor of 2 for the Fock exchange potential. For the calculation of the band-averaged effective mass tensor, the carrier concentration and temperature were set to  $10^{16} \text{ cm}^{-3}$  and 300 K, respectively, and a  $\Gamma$ -centered  $k$ -point mesh of  $24\times 24\times 24$  was taken with a reduced mesh by a factor of 4 for the Fock exchange potential.

The Cd vacancy and interstitial were modeled using a supercell that is a  $2\times 2\times 2$  enlargement of the conventional cell. The vacant tetrahedral site in the zinc-blende structure, similar to the interstitial of  $\text{La}_2\text{CdO}_2\text{Se}_2$ , was employed as the interstitial site. The initial structure of each defect supercell was subjected to random displacements of up to 0.2 Å in the atoms adjacent to the defects, eliminating symmetry-induced relaxation constraints. The internal atomic coordinates were relaxed under fixed lattice vectors until the atomic force became smaller than  $0.03 \text{ eV \AA}^{-1}$ . A  $2\times 2\times 2$  non- $\Gamma$ -centered  $k$ -point mesh with a plane-wave cutoff of 400 eV was used, and spin polarization was considered in all defect supercell calculations. The static dielectric tensor was calculated by the finite-electric-field approach using a  $\Gamma$ -centered  $12\times 12\times 12$   $k$ -point mesh and a cut-off energy of 400 eV, where the  $k$ -point mesh was reduced by a factor of 2 for the Fock exchange potential. The components of the obtained dielectric tensor were  $\epsilon_{xx}^{\text{ele}} = 5.89$  and  $\epsilon_{xx}^{\text{ion}} = 3.41$ . For the chemical potential, we considered the conditions of equilibrium with the Cd crystal [cation-rich conditions:  $\Delta\mu_{\text{Cd}} = 0$  (eV)] and the conditions of the minimum chemical potential of Cd in  $\text{La}_2\text{CdO}_2\text{Se}_2$  [anion-rich conditions:  $\Delta\mu_{\text{Cd}} = -1.09$  (eV)].

## Selection of dopants

As explained in Section 3.3 of the main text, it is too computationally expensive to use the HSE06 hybrid functional for the screening of all the candidate dopants. Therefore, we performed a series of calculations with the PBEsol-GGA+ $U$ , which underestimates the band gap but can reduce the computational cost. The Hubbard  $U$  parameter of 5.0 eV was applied to the Cd 4d-orbitals. The  $k$ -points mesh, the cut-off energies, and the conditions and criteria required to draw the chemical potential diagram are set to the same as in the HSE06 calculation (Section 2). The PAW radial cutoffs were set to 1.08, 1.64, 1.32, 1.06, 1.59, 1.48, 1.48, 1.59, 1.22, and 1.64 Å for Li, K, Rb, Mg, Ca, Ba, Ti, Hf, Ga, and In, respectively. Li 2s, K 3p and 4s, Rb 4s, 4p, and 5s, Mg 3s, Ca 3p and 4s, Ba 5s, 5p, and 6s, Ti 4s and 3d, Hf 6s and 5d, Ga 3d, 4s, and 4p, and In 5s and 5p were treated as valence electrons. To correct the band edges, we adopted the non-self-consistent HSE06 (nsc-HSE06) approach. Using the self-consistent wave function and charge density obtained from the PBEsol-GGA+ $U$  calculation as the input, we diagonalized the Hamiltonian once with the HSE06 to obtain the nsc-HSE06 single-particle levels. The band gap of  $\text{La}_2\text{CdO}_2\text{Se}_2$  obtained by combining the PBEsol-GGA+ $U$  and nsc-HSE06 calculations is 3.27 eV, which is 0.24 eV larger than that obtained by the self-consistent HSE06 calculation and coincidentally closer to the experimental value ( $\sim 3.3$  eV). Possible reasons for the difference in the calculated band gaps include differences in equilibrium lattice constants and errors in non-self-consistent calculation.

Figure S1 shows the formation energy diagrams of the dopants in  $\text{La}_2\text{CdO}_2\text{Se}_2$  at the cation-rich and anion-rich conditions. The range of the Fermi level is extended from the band edges obtained by the PBEsol-GGA+ $U$  calculation to those obtained by the nsc-HSE06 calculation using the primitive unit cell. The chemical potential conditions and competing phases are given in Tables S3-S16. As mentioned in the main text, all the donor dopants form deep donor levels associated with localized states even at the PBEsol-GGA+ $U$  level. Zr and Al, which have the shallowest donor levels at each cation site, were selected for the subsequent HSE06 calculations. For the acceptor dopants, all the candidates considered are shallow acceptors with PBEsol-GGA+ $U$ . Sr and Na, which have a good balance of the formation energies between the substitution and interstitial sites, were selected for the HSE06 calculations.

**Table S1** Limits of the chemical potentials at which  $\text{La}_2\text{CdO}_2\text{Se}_2$  exists in the single phase in the La-Cd-O-Se quaternary system and the competing phases at respective limits. The unit of the chemical potential is eV.

| Conditions      | $\Delta\mu_{\text{La}}$ | $\Delta\mu_{\text{Cd}}$ | $\Delta\mu_{\text{O}}$ | $\Delta\mu_{\text{Se}}$ | Competing phases                                                                                        |
|-----------------|-------------------------|-------------------------|------------------------|-------------------------|---------------------------------------------------------------------------------------------------------|
| A (Anion rich)  | -6.23                   | -1.09                   | -1.84                  | -0.42                   | CdSe, $\text{La}_2\text{O}_3$ , $\text{La}_4\text{Se}_3\text{O}_4$                                      |
| B               | -6.19                   | -1.08                   | -1.87                  | -0.44                   | $\text{La}_2\text{O}_3$ , $\text{La}_2\text{SeO}_2$ , $\text{La}_4\text{Se}_3\text{O}_4$                |
| C               | -4.60                   | 0                       | -2.93                  | -1.51                   | CdSe, $\text{La}_2\text{O}_3$ , Cd                                                                      |
| D               | -4.57                   | 0                       | -2.95                  | -1.52                   | $\text{La}_2\text{O}_3$ , $\text{La}_2\text{SeO}_2$ , Cd                                                |
| E               | -5.08                   | -1.08                   | -2.99                  | -0.44                   | $\text{La}_{10}\text{Se}_{14}\text{O}$ , $\text{La}_2\text{SeO}_2$ , $\text{La}_4\text{Se}_3\text{O}_4$ |
| F               | -5.10                   | -1.09                   | -2.97                  | -0.42                   | CdSe, $\text{La}_{10}\text{Se}_{14}\text{O}$ , $\text{La}_4\text{Se}_3\text{O}_4$                       |
| G (Cation rich) | -3.45                   | 0                       | -4.07                  | -1.52                   | $\text{La}_{10}\text{Se}_{14}\text{O}$ , $\text{La}_2\text{SeO}_2$ , Cd                                 |
| H               | -3.47                   | 0                       | -4.06                  | -1.51                   | CdSe, $\text{La}_{10}\text{Se}_{14}\text{O}$ , Cd                                                       |

**Table S2** Thermodynamic transition levels  $\varepsilon(q/q')$  of the native defects and dopants with respect to the VBM. Note that hydrogenic effective-mass states are not included here.

| Native defects          | $\varepsilon(q/q')$  | (eV) | Dopants                 | $\varepsilon(q/q')$  | (eV) |
|-------------------------|----------------------|------|-------------------------|----------------------|------|
| $V_{\text{La}}$         | $\varepsilon(0/-1)$  | 0.26 | $\text{Na}_{\text{Cd}}$ | $\varepsilon(0/-1)$  | 0.04 |
|                         | $\varepsilon(-1/-2)$ | 0.36 | $\text{Sr}_{\text{La}}$ | $\varepsilon(0/-1)$  | 0.06 |
|                         | $\varepsilon(-2/-3)$ | 0.59 | $\text{Al}_{\text{Cd}}$ | $\varepsilon(+1/-1)$ | 3.00 |
| $V_{\text{Cd}}$         | $\varepsilon(0/-2)$  | 0.17 | $\text{Zr}_{\text{La}}$ | $\varepsilon(+1/0)$  | 2.60 |
| $V_{\text{O}}$          | $\varepsilon(+2/+1)$ | 1.66 | $\text{Na}_i$           | $\varepsilon(+1/0)$  | 2.94 |
|                         | $\varepsilon(+1/0)$  | 2.67 | $\text{Sr}_i$           | $\varepsilon(+2/+1)$ | 2.34 |
| $V_{\text{Se}}$         | $\varepsilon(+2/0)$  | 1.31 |                         | $\varepsilon(+1/0)$  | 2.66 |
|                         | $\varepsilon(0/-1)$  | 2.62 |                         | $\varepsilon(0/-1)$  | 2.91 |
| $\text{La}_{\text{Cd}}$ | $\varepsilon(+1/0)$  | 2.68 | $\text{Al}_i$           | $\varepsilon(+3/+1)$ | 2.09 |
|                         | $\varepsilon(0/-1)$  | 2.85 |                         | $\varepsilon(+1/0)$  | 2.62 |
| $\text{Cd}_{\text{La}}$ | $\varepsilon(0/-1)$  | 0.15 |                         | $\varepsilon(0/-1)$  | 2.96 |
| $\text{La}_i$           | $\varepsilon(+3/+2)$ | 1.79 | $\text{Zr}_i$           | $\varepsilon(+4/+3)$ | 1.28 |
|                         | $\varepsilon(+2/+1)$ | 2.21 |                         | $\varepsilon(+3/+2)$ | 1.73 |
|                         | $\varepsilon(+1/0)$  | 2.44 |                         | $\varepsilon(+2/+1)$ | 2.09 |
| $\text{Cd}_i$           | $\varepsilon(0/-1)$  | 2.74 |                         | $\varepsilon(+1/0)$  | 2.32 |
|                         | $\varepsilon(+2/0)$  | 2.34 |                         | $\varepsilon(0/-1)$  | 2.52 |
|                         | $\varepsilon(0/-1)$  | 2.76 |                         |                      |      |
| $\text{O}_i$            | $\varepsilon(0/-1)$  | 0.65 |                         |                      |      |
|                         | $\varepsilon(-1/-2)$ | 1.03 |                         |                      |      |
| $\text{Se}_i$           | $\varepsilon(0/-2)$  | 2.33 |                         |                      |      |

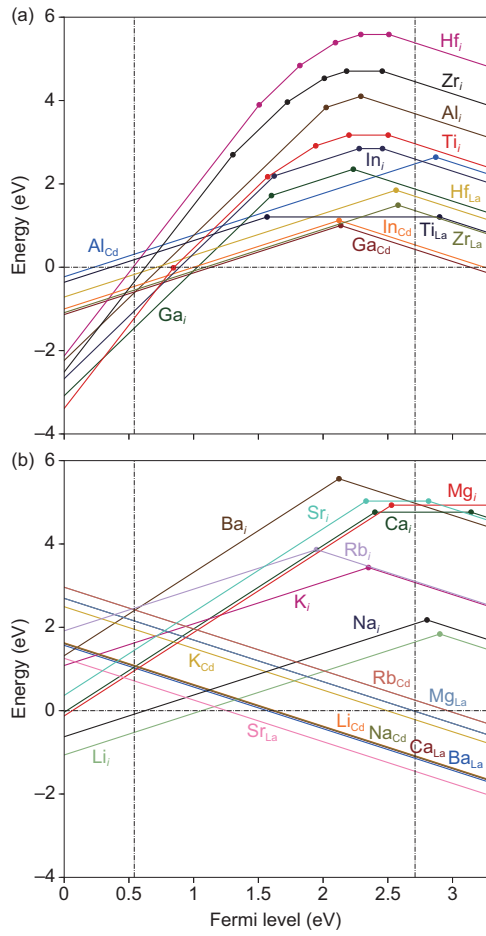

**Fig. S1** (a) Formation energies of Ti, Zr, Hf, Al, Ga, and In dopants in  $\text{La}_2\text{CdO}_2\text{Se}_2$  at the cation-rich conditions, and (b) formation energies of Mg, Ca, Sr, Ba, Li, Na, K, and Rb dopants in  $\text{La}_2\text{CdO}_2\text{Se}_2$  at the anion-rich conditions, calculated by PBEsol-GGA+ $U$ . The range of the Fermi level is extended from the band edges obtained by the PBEsol-GGA+ $U$  calculation (vertical dashed dotted lines) to those obtained by the nsc-HSE06 calculation.

**Table S3** Limits of the chemical potentials at which  $\text{La}_2\text{CdO}_2\text{Se}_2$  exists in the single phase in the La-Cd-O-Se-Ti quinary system and the competing phases at respective limits, calculated by PBEsol-GGA+ $U$ . The unit of the chemical potential is eV.

| Conditions      | $\Delta\mu_{\text{La}}$ | $\Delta\mu_{\text{Cd}}$ | $\Delta\mu_{\text{O}}$ | $\Delta\mu_{\text{Se}}$ | $\Delta\mu_{\text{Ti}}$ | Competing phases                                                                                                                                         |
|-----------------|-------------------------|-------------------------|------------------------|-------------------------|-------------------------|----------------------------------------------------------------------------------------------------------------------------------------------------------|
| A               | -4.36                   | -0.85                   | -3.32                  | -0.56                   | -2.71                   | $\text{La}_{10}\text{Se}_{14}\text{O}$ , $\text{La}_{10}\text{Se}_{19}$ , $\text{La}_2\text{Ti}_2\text{O}_7$ , $\text{La}_4\text{Se}_3\text{O}_4$        |
| B               | -4.32                   | -0.83                   | -3.34                  | -0.59                   | -2.68                   | $\text{La}_{10}\text{Se}_{14}\text{O}$ , $\text{La}_2\text{SeO}_2$ , $\text{La}_2\text{Ti}_2\text{O}_7$ , $\text{La}_4\text{Se}_3\text{O}_4$             |
| C               | -3.82                   | -0.50                   | -3.68                  | -0.93                   | -2.00                   | $\text{La}_{10}\text{Se}_{14}\text{O}$ , $\text{La}_2\text{SeO}_2$ , $\text{La}_2\text{Ti}_2\text{O}_7$ , $\text{La}_5\text{Ti}_5\text{O}_{17}$          |
| D               | -4.35                   | -0.79                   | -3.36                  | -0.57                   | -2.59                   | $\text{CdSe}$ , $\text{La}_{10}\text{Se}_{14}\text{O}$ , $\text{La}_{10}\text{Se}_{19}$ , $\text{La}_2\text{Ti}_2\text{O}_7$                             |
| E (Cation rich) | -3.07                   | 0                       | -4.17                  | -1.42                   | -1.20                   | $\text{La}_{10}\text{Se}_{14}\text{O}$ , $\text{La}_2\text{SeO}_2$ , $\text{TiO}$ , $\text{Cd}$                                                          |
| F               | -3.23                   | -0.11                   | -4.07                  | -1.32                   | -1.31                   | $\text{La}_{10}\text{Se}_{14}\text{O}$ , $\text{La}_2\text{SeO}_2$ , $\text{Ti}_2\text{O}_3$ , $\text{TiO}$                                              |
| G               | -3.17                   | 0                       | -4.14                  | -1.35                   | -1.23                   | $\text{CdSe}$ , $\text{La}_{10}\text{Se}_{14}\text{O}$ , $\text{TiO}$ , $\text{Cd}$                                                                      |
| H               | -3.28                   | -0.07                   | -4.07                  | -1.28                   | -1.31                   | $\text{CdSe}$ , $\text{La}_{10}\text{Se}_{14}\text{O}$ , $\text{Ti}_2\text{O}_3$ , $\text{TiO}$                                                          |
| I               | -3.56                   | -0.26                   | -3.89                  | -1.10                   | -1.58                   | $\text{CdSe}$ , $\text{La}_{10}\text{Se}_{14}\text{O}$ , $\text{La}_6\text{Ti}_3\text{Se}_9\text{O}_5$ , $\text{Ti}_2\text{O}_3$                         |
| J               | -3.41                   | -0.22                   | -3.95                  | -1.20                   | -1.49                   | $\text{La}_{10}\text{Se}_{14}\text{O}$ , $\text{La}_2\text{SeO}_2$ , $\text{La}_5\text{Ti}_5\text{O}_{17}$ , $\text{Ti}_2\text{O}_3$                     |
| K               | -3.56                   | -0.29                   | -3.87                  | -1.09                   | -1.61                   | $\text{La}_{10}\text{Se}_{14}\text{O}$ , $\text{La}_5\text{Ti}_5\text{O}_{17}$ , $\text{La}_6\text{Ti}_3\text{Se}_9\text{O}_5$ , $\text{Ti}_2\text{O}_3$ |
| L               | -3.87                   | -0.46                   | -3.68                  | -0.89                   | -1.95                   | $\text{CdSe}$ , $\text{La}_{10}\text{Se}_{14}\text{O}$ , $\text{La}_2\text{Ti}_2\text{O}_7$ , $\text{La}_5\text{Ti}_5\text{O}_{17}$                      |
| M               | -3.74                   | -0.38                   | -3.76                  | -0.97                   | -1.79                   | $\text{CdSe}$ , $\text{La}_{10}\text{Se}_{14}\text{O}$ , $\text{La}_5\text{Ti}_5\text{O}_{17}$ , $\text{La}_6\text{Ti}_3\text{Se}_9\text{O}_5$           |
| N               | -4.57                   | -0.90                   | -3.19                  | -0.45                   | -2.94                   | $\text{CdSe}$ , $\text{La}_{10}\text{Se}_{19}$ , $\text{La}_2\text{Ti}_2\text{O}_7$ , $\text{La}_4\text{Se}_3\text{O}_4$                                 |
| O (Anion rich)  | -5.72                   | -0.90                   | -2.05                  | -0.45                   | -6.02                   | $\text{CdSe}$ , $\text{La}_2\text{O}_3$ , $\text{La}_2\text{TiO}_5$ , $\text{La}_4\text{Se}_3\text{O}_4$                                                 |
| P               | -5.41                   | -0.83                   | -2.25                  | -0.59                   | -5.60                   | $\text{La}_2\text{O}_3$ , $\text{La}_2\text{SeO}_2$ , $\text{La}_2\text{TiO}_5$ , $\text{La}_4\text{Se}_3\text{O}_4$                                     |
| Q               | -5.32                   | -0.90                   | -2.45                  | -0.45                   | -4.80                   | $\text{CdSe}$ , $\text{La}_2\text{Ti}_2\text{O}_7$ , $\text{La}_2\text{TiO}_5$ , $\text{La}_4\text{Se}_3\text{O}_4$                                      |
| R               | -5.01                   | -0.83                   | -2.66                  | -0.59                   | -4.39                   | $\text{La}_2\text{SeO}_2$ , $\text{La}_2\text{Ti}_2\text{O}_7$ , $\text{La}_2\text{TiO}_5$ , $\text{La}_4\text{Se}_3\text{O}_4$                          |
| S               | -4.37                   | 0                       | -2.95                  | -1.35                   | -4.21                   | $\text{CdSe}$ , $\text{La}_2\text{O}_3$ , $\text{La}_2\text{TiO}_5$ , $\text{Cd}$                                                                        |
| T               | -4.16                   | 0                       | -3.09                  | -1.42                   | -3.93                   | $\text{La}_2\text{O}_3$ , $\text{La}_2\text{SeO}_2$ , $\text{La}_2\text{TiO}_5$ , $\text{Cd}$                                                            |
| U               | -3.96                   | 0                       | -3.35                  | -1.35                   | -3.00                   | $\text{CdSe}$ , $\text{La}_2\text{Ti}_2\text{O}_7$ , $\text{La}_2\text{TiO}_5$ , $\text{Cd}$                                                             |
| V               | -3.76                   | 0                       | -3.49                  | -1.42                   | -2.72                   | $\text{La}_2\text{SeO}_2$ , $\text{La}_2\text{Ti}_2\text{O}_7$ , $\text{La}_2\text{TiO}_5$ , $\text{Cd}$                                                 |
| W               | -3.25                   | 0                       | -4.07                  | -1.35                   | -1.31                   | $\text{CdSe}$ , $\text{Ti}_2\text{O}_3$ , $\text{TiO}$ , $\text{Cd}$                                                                                     |
| X               | -3.64                   | 0                       | -3.68                  | -1.35                   | -2.18                   | $\text{CdSe}$ , $\text{La}_2\text{Ti}_2\text{O}_7$ , $\text{La}_5\text{Ti}_5\text{O}_{17}$ , $\text{Cd}$                                                 |
| Y               | -3.57                   | 0                       | -3.68                  | -1.42                   | -2.25                   | $\text{La}_2\text{SeO}_2$ , $\text{La}_2\text{Ti}_2\text{O}_7$ , $\text{La}_5\text{Ti}_5\text{O}_{17}$ , $\text{Cd}$                                     |
| Z               | -3.32                   | 0                       | -4.00                  | -1.35                   | -1.42                   | $\text{CdSe}$ , $\text{La}_5\text{Ti}_5\text{O}_{17}$ , $\text{Ti}_2\text{O}_3$ , $\text{Cd}$                                                            |
| AA              | -3.18                   | 0                       | -4.07                  | -1.42                   | -1.31                   | $\text{La}_2\text{SeO}_2$ , $\text{La}_5\text{Ti}_5\text{O}_{17}$ , $\text{Ti}_2\text{O}_3$ , $\text{TiO}$ , $\text{Cd}$                                 |
| AB              | -3.17                   | 0                       | -4.07                  | -1.42                   | -1.31                   | $\text{La}_2\text{SeO}_2$ , $\text{La}_5\text{Ti}_5\text{O}_{17}$ , $\text{Ti}_2\text{O}_3$ , $\text{TiO}$ , $\text{Cd}$                                 |
| AC              | -3.18                   | -0.01                   | -4.07                  | -1.41                   | -1.31                   | $\text{La}_2\text{SeO}_2$ , $\text{La}_5\text{Ti}_5\text{O}_{17}$ , $\text{Ti}_2\text{O}_3$ , $\text{TiO}$                                               |
| AD              | -3.65                   | -0.32                   | -3.82                  | -1.04                   | -1.68                   | $\text{CdSe}$ , $\text{La}_5\text{Ti}_5\text{O}_{17}$ , $\text{La}_6\text{Ti}_3\text{Se}_9\text{O}_5$ , $\text{Ti}_2\text{O}_3$                          |

**Table S4** Limits of the chemical potentials at which  $\text{La}_2\text{CdO}_2\text{Se}_2$  exists in the single phase in the La-Cd-O-Se-Zr quinary system and the competing phases at respective limits, calculated by PBEsol-GGA+ $U$ . The unit of the chemical potential is eV.

| Conditions      | $\Delta\mu_{\text{La}}$ | $\Delta\mu_{\text{Cd}}$ | $\Delta\mu_{\text{O}}$ | $\Delta\mu_{\text{Se}}$ | $\Delta\mu_{\text{Zr}}$ | Competing phases                                                                                                              |
|-----------------|-------------------------|-------------------------|------------------------|-------------------------|-------------------------|-------------------------------------------------------------------------------------------------------------------------------|
| A               | -4.57                   | -0.90                   | -3.19                  | -0.45                   | -4.32                   | $\text{CdSe}$ , $\text{La}_{10}\text{Se}_{19}$ , $\text{La}_4\text{Se}_3\text{O}_4$ , $\text{ZrO}_2$                          |
| B               | -4.35                   | -0.79                   | -3.36                  | -0.57                   | -3.99                   | $\text{CdSe}$ , $\text{La}_{10}\text{Se}_{14}\text{O}$ , $\text{La}_{10}\text{Se}_{19}$ , $\text{ZrO}_2$                      |
| C               | -4.36                   | -0.85                   | -3.32                  | -0.56                   | -4.07                   | $\text{La}_{10}\text{Se}_{14}\text{O}$ , $\text{La}_{10}\text{Se}_{19}$ , $\text{La}_4\text{Se}_3\text{O}_4$ , $\text{ZrO}_2$ |
| D               | -4.32                   | -0.83                   | -3.34                  | -0.59                   | -4.02                   | $\text{La}_{10}\text{Se}_{14}\text{O}$ , $\text{La}_2\text{SeO}_2$ , $\text{La}_4\text{Se}_3\text{O}_4$ , $\text{ZrO}_2$      |
| E               | -4.93                   | -0.90                   | -2.84                  | -0.45                   | -5.04                   | $\text{CdSe}$ , $\text{La}_2\text{Zr}_2\text{O}_7$ , $\text{La}_4\text{Se}_3\text{O}_4$ , $\text{ZrO}_2$                      |
| F               | -4.62                   | -0.83                   | -3.04                  | -0.59                   | -4.62                   | $\text{La}_2\text{SeO}_2$ , $\text{La}_2\text{Zr}_2\text{O}_7$ , $\text{La}_4\text{Se}_3\text{O}_4$ , $\text{ZrO}_2$          |
| G               | -3.17                   | 0                       | -4.14                  | -1.35                   | -2.42                   | $\text{CdSe}$ , $\text{La}_{10}\text{Se}_{14}\text{O}$ , $\text{ZrO}_2$ , $\text{Cd}$                                         |
| H (Anion rich)  | -3.07                   | 0                       | -4.17                  | -1.42                   | -2.36                   | $\text{La}_{10}\text{Se}_{14}\text{O}$ , $\text{La}_2\text{SeO}_2$ , $\text{ZrO}_2$ , $\text{Cd}$                             |
| I               | -3.58                   | 0                       | -3.74                  | -1.35                   | -3.23                   | $\text{CdSe}$ , $\text{La}_2\text{Zr}_2\text{O}_7$ , $\text{ZrO}_2$ , $\text{Cd}$                                             |
| J               | -3.37                   | 0                       | -3.88                  | -1.42                   | -2.95                   | $\text{La}_2\text{SeO}_2$ , $\text{La}_2\text{Zr}_2\text{O}_7$ , $\text{ZrO}_2$ , $\text{Cd}$                                 |
| K (Cation rich) | -5.72                   | -0.90                   | -2.05                  | -0.45                   | -7.01                   | $\text{CdSe}$ , $\text{La}_2\text{O}_3$ , $\text{La}_2\text{Zr}_2\text{O}_7$ , $\text{La}_4\text{Se}_3\text{O}_4$             |
| L               | -5.41                   | -0.83                   | -2.25                  | -0.59                   | -6.59                   | $\text{La}_2\text{O}_3$ , $\text{La}_2\text{SeO}_2$ , $\text{La}_2\text{Zr}_2\text{O}_7$ , $\text{La}_4\text{Se}_3\text{O}_4$ |
| M               | -4.37                   | 0                       | -2.95                  | -1.35                   | -5.20                   | $\text{CdSe}$ , $\text{La}_2\text{O}_3$ , $\text{La}_2\text{Zr}_2\text{O}_7$ , $\text{Cd}$                                    |
| N               | -4.16                   | 0                       | -3.09                  | -1.42                   | -4.93                   | $\text{La}_2\text{O}_3$ , $\text{La}_2\text{SeO}_2$ , $\text{La}_2\text{Zr}_2\text{O}_7$ , $\text{Cd}$                        |

**Table S5** Limits of the chemical potentials at which  $\text{La}_2\text{CdO}_2\text{Se}_2$  exists in the single phase in the La-Cd-O-Se-Hf quinary system and the competing phases at respective limits, calculated by PBEsol-GGA+ $U$ . The unit of the chemical potential is eV.

| Conditions      | $\Delta\mu_{\text{La}}$ | $\Delta\mu_{\text{Cd}}$ | $\Delta\mu_{\text{O}}$ | $\Delta\mu_{\text{Se}}$ | $\Delta\mu_{\text{Hf}}$ | Competing phases                                                                                                                                                    |
|-----------------|-------------------------|-------------------------|------------------------|-------------------------|-------------------------|---------------------------------------------------------------------------------------------------------------------------------------------------------------------|
| A               | -4.57                   | -0.90                   | -3.19                  | -0.45                   | -4.69                   | CdSe, HfO <sub>2</sub> , La <sub>10</sub> Se <sub>19</sub> , La <sub>4</sub> Se <sub>3</sub> O <sub>4</sub>                                                         |
| B               | -4.35                   | -0.79                   | -3.36                  | -0.57                   | -4.37                   | CdSe, HfO <sub>2</sub> , La <sub>10</sub> Se <sub>14</sub> O, La <sub>10</sub> Se <sub>19</sub>                                                                     |
| C               | -4.36                   | -0.85                   | -3.32                  | -0.56                   | -4.44                   | HfO <sub>2</sub> , La <sub>10</sub> Se <sub>14</sub> O, La <sub>10</sub> Se <sub>19</sub> , La <sub>4</sub> Se <sub>3</sub> O <sub>4</sub>                          |
| D               | -4.32                   | -0.83                   | -3.34                  | -0.59                   | -4.40                   | HfO <sub>2</sub> , La <sub>10</sub> Se <sub>14</sub> O, La <sub>2</sub> SeO <sub>2</sub> , La <sub>4</sub> Se <sub>3</sub> O <sub>4</sub>                           |
| E               | -4.82                   | -0.90                   | -2.95                  | -0.45                   | -5.19                   | CdSe, HfO <sub>2</sub> , La <sub>2</sub> Hf <sub>2</sub> O <sub>7</sub> , La <sub>4</sub> Se <sub>3</sub> O <sub>4</sub>                                            |
| F               | -4.51                   | -0.83                   | -3.15                  | -0.59                   | -4.78                   | HfO <sub>2</sub> , La <sub>2</sub> Hf <sub>2</sub> O <sub>7</sub> , La <sub>2</sub> SeO <sub>2</sub> , La <sub>4</sub> Se <sub>3</sub> O <sub>4</sub>               |
| G               | -3.17                   | 0                       | -4.14                  | -1.35                   | -2.79                   | CdSe, HfO <sub>2</sub> , La <sub>10</sub> Se <sub>14</sub> O, Cd                                                                                                    |
| H (Cation rich) | -3.07                   | 0                       | -4.17                  | -1.42                   | -2.73                   | HfO <sub>2</sub> , La <sub>10</sub> Se <sub>14</sub> O, La <sub>2</sub> SeO <sub>2</sub> , Cd                                                                       |
| I               | -3.47                   | 0                       | -3.85                  | -1.35                   | -3.39                   | CdSe, HfO <sub>2</sub> , La <sub>2</sub> Hf <sub>2</sub> O <sub>7</sub> , Cd                                                                                        |
| J               | -3.26                   | 0                       | -3.99                  | -1.42                   | -3.11                   | HfO <sub>2</sub> , La <sub>2</sub> Hf <sub>2</sub> O <sub>7</sub> , La <sub>2</sub> SeO <sub>2</sub> , Cd                                                           |
| K (Anion rich)  | -5.72                   | -0.90                   | -2.05                  | -0.45                   | -7.44                   | CdSe, La <sub>2</sub> Hf <sub>2</sub> O <sub>7</sub> , La <sub>2</sub> O <sub>3</sub> , La <sub>4</sub> Se <sub>3</sub> O <sub>4</sub>                              |
| L               | -5.41                   | -0.83                   | -2.25                  | -0.59                   | -7.03                   | La <sub>2</sub> Hf <sub>2</sub> O <sub>7</sub> , La <sub>2</sub> O <sub>3</sub> , La <sub>2</sub> SeO <sub>2</sub> , La <sub>4</sub> Se <sub>3</sub> O <sub>4</sub> |
| M               | -4.37                   | 0                       | -2.95                  | -1.35                   | -5.63                   | CdSe, La <sub>2</sub> Hf <sub>2</sub> O <sub>7</sub> , La <sub>2</sub> O <sub>3</sub> , Cd                                                                          |
| N               | -4.16                   | 0                       | -3.09                  | -1.42                   | -5.36                   | La <sub>2</sub> Hf <sub>2</sub> O <sub>7</sub> , La <sub>2</sub> O <sub>3</sub> , La <sub>2</sub> SeO <sub>2</sub> , Cd                                             |

**Table S6** Limits of the chemical potentials at which  $\text{La}_2\text{CdO}_2\text{Se}_2$  exists in the single phase in the La-Cd-O-Se-Al quinary system and the competing phases at respective limits, calculated by PBEsol-GGA+ $U$ . The unit of the chemical potential is eV.

| Conditions      | $\Delta\mu_{\text{La}}$ | $\Delta\mu_{\text{Cd}}$ | $\Delta\mu_{\text{O}}$ | $\Delta\mu_{\text{Se}}$ | $\Delta\mu_{\text{Al}}$ | Competing phases                                                                                                                             |
|-----------------|-------------------------|-------------------------|------------------------|-------------------------|-------------------------|----------------------------------------------------------------------------------------------------------------------------------------------|
| A               | -4.57                   | -0.90                   | -3.19                  | -0.45                   | -3.11                   | CdSe, La <sub>10</sub> Se <sub>19</sub> , La <sub>4</sub> Se <sub>3</sub> O <sub>4</sub> , LaAlO <sub>3</sub>                                |
| B               | -4.35                   | -0.79                   | -3.36                  | -0.57                   | -2.84                   | CdSe, La <sub>10</sub> Se <sub>14</sub> O, La <sub>10</sub> Se <sub>19</sub> , LaAlO <sub>3</sub>                                            |
| C               | -4.36                   | -0.85                   | -3.32                  | -0.56                   | -2.94                   | La <sub>10</sub> Se <sub>14</sub> O, La <sub>10</sub> Se <sub>19</sub> , La <sub>4</sub> Se <sub>3</sub> O <sub>4</sub> , LaAlO <sub>3</sub> |
| D               | -4.32                   | -0.83                   | -3.34                  | -0.59                   | -2.92                   | La <sub>10</sub> Se <sub>14</sub> O, La <sub>2</sub> SeO <sub>2</sub> , La <sub>4</sub> Se <sub>3</sub> O <sub>4</sub> , LaAlO <sub>3</sub>  |
| E (Cation rich) | -5.72                   | -0.90                   | -2.05                  | -0.45                   | -5.41                   | CdSe, La <sub>2</sub> O <sub>3</sub> , La <sub>4</sub> Se <sub>3</sub> O <sub>4</sub> , LaAlO <sub>3</sub>                                   |
| F               | -5.41                   | -0.83                   | -2.25                  | -0.59                   | -5.10                   | La <sub>2</sub> O <sub>3</sub> , La <sub>2</sub> SeO <sub>2</sub> , La <sub>4</sub> Se <sub>3</sub> O <sub>4</sub> , LaAlO <sub>3</sub>      |
| G               | -3.17                   | 0                       | -4.14                  | -1.35                   | -1.66                   | CdSe, La <sub>10</sub> Se <sub>14</sub> O, LaAlO <sub>3</sub> , Cd                                                                           |
| H (Anion rich)  | -3.07                   | 0                       | -4.17                  | -1.42                   | -1.67                   | La <sub>10</sub> Se <sub>14</sub> O, La <sub>2</sub> SeO <sub>2</sub> , LaAlO <sub>3</sub> , Cd                                              |
| I               | -4.37                   | 0                       | -2.95                  | -1.35                   | -4.05                   | CdSe, La <sub>2</sub> O <sub>3</sub> , LaAlO <sub>3</sub> , Cd                                                                               |
| J               | -4.16                   | 0                       | -3.09                  | -1.42                   | -3.85                   | La <sub>2</sub> O <sub>3</sub> , La <sub>2</sub> SeO <sub>2</sub> , LaAlO <sub>3</sub> , Cd                                                  |

**Table S7** Limits of the chemical potentials at which  $\text{La}_2\text{CdO}_2\text{Se}_2$  exists in the single phase in the La-Cd-O-Se-Ga quinary system and the competing phases at respective limits, calculated by PBEsol-GGA+ $U$ . The unit of the chemical potential is eV.

| Conditions      | $\Delta\mu_{\text{La}}$ | $\Delta\mu_{\text{Cd}}$ | $\Delta\mu_{\text{O}}$ | $\Delta\mu_{\text{Se}}$ | $\Delta\mu_{\text{Ga}}$ | Competing phases                                                                                                                            |
|-----------------|-------------------------|-------------------------|------------------------|-------------------------|-------------------------|---------------------------------------------------------------------------------------------------------------------------------------------|
| A               | -4.36                   | -0.85                   | -3.32                  | -0.56                   | -0.69                   | $\text{Cd}(\text{GaSe}_2)_2$ , $\text{La}_{10}\text{Se}_{14}\text{O}$ , $\text{La}_{10}\text{Se}_{19}$ , $\text{La}_4\text{Se}_3\text{O}_4$ |
| B (Cation rich) | -3.07                   | 0                       | -4.17                  | -1.42                   | 0                       | $\text{La}_{10}\text{Se}_{14}\text{O}$ , $\text{La}_2\text{SeO}_2$ , Cd, Ga                                                                 |
| C               | -4.35                   | -0.79                   | -3.36                  | -0.57                   | -0.71                   | $\text{Cd}(\text{GaSe}_2)_2$ , CdSe, $\text{La}_{10}\text{Se}_{14}\text{O}$ , $\text{La}_{10}\text{Se}_{19}$                                |
| D               | -4.09                   | -0.68                   | -3.50                  | -0.75                   | -0.41                   | $\text{Cd}(\text{GaSe}_2)_2$ , GaSe, $\text{La}_{10}\text{Se}_{14}\text{O}$ , $\text{La}_2\text{SeO}_2$                                     |
| E               | -3.48                   | -0.27                   | -3.91                  | -1.15                   | 0                       | GaSe, $\text{La}_{10}\text{Se}_{14}\text{O}$ , $\text{La}_2\text{SeO}_2$ , Ga                                                               |
| F               | -3.17                   | 0                       | -4.14                  | -1.35                   | 0                       | CdSe, $\text{La}_{10}\text{Se}_{14}\text{O}$ , Cd, Ga                                                                                       |
| G               | -3.98                   | -0.54                   | -3.61                  | -0.82                   | -0.34                   | $\text{Cd}(\text{GaSe}_2)_2$ , CdSe, GaSe, $\text{La}_{10}\text{Se}_{14}\text{O}$                                                           |
| H               | -3.47                   | -0.20                   | -3.94                  | -1.15                   | 0                       | CdSe, GaSe, $\text{La}_{10}\text{Se}_{14}\text{O}$ , Ga                                                                                     |
| I (Anion rich)  | -5.72                   | -0.90                   | -2.05                  | -0.45                   | -2.30                   | CdSe, $\text{La}_2\text{O}_3$ , $\text{La}_4\text{Ga}_2\text{O}_9$ , $\text{La}_4\text{Se}_3\text{O}_4$                                     |
| J               | -5.41                   | -0.83                   | -2.25                  | -0.59                   | -1.99                   | $\text{La}_2\text{O}_3$ , $\text{La}_2\text{SeO}_2$ , $\text{La}_4\text{Ga}_2\text{O}_9$ , $\text{La}_4\text{Se}_3\text{O}_4$               |
| K               | -4.37                   | 0                       | -2.95                  | -1.35                   | -0.95                   | CdSe, $\text{La}_2\text{O}_3$ , $\text{La}_4\text{Ga}_2\text{O}_9$ , Cd                                                                     |
| L               | -4.16                   | 0                       | -3.09                  | -1.42                   | -0.74                   | $\text{La}_2\text{O}_3$ , $\text{La}_2\text{SeO}_2$ , $\text{La}_4\text{Ga}_2\text{O}_9$ , Cd                                               |
| M               | -4.57                   | -0.90                   | -3.19                  | -0.45                   | -0.89                   | $\text{Cd}(\text{GaSe}_2)_2$ , CdSe, $\text{La}_{10}\text{Se}_{19}$ , $\text{La}_4\text{Se}_3\text{O}_4$                                    |
| N               | -5.41                   | -0.90                   | -2.35                  | -0.45                   | -1.53                   | CdSe, $\text{La}_3\text{Ga}_5\text{O}_{12}$ , $\text{La}_4\text{Ga}_2\text{O}_9$ , $\text{La}_4\text{Se}_3\text{O}_4$                       |
| O               | -5.10                   | -0.83                   | -2.56                  | -0.59                   | -1.22                   | $\text{La}_2\text{SeO}_2$ , $\text{La}_3\text{Ga}_5\text{O}_{12}$ , $\text{La}_4\text{Ga}_2\text{O}_9$ , $\text{La}_4\text{Se}_3\text{O}_4$ |
| P               | -4.06                   | 0                       | -3.26                  | -1.35                   | -0.18                   | CdSe, $\text{La}_3\text{Ga}_5\text{O}_{12}$ , $\text{La}_4\text{Ga}_2\text{O}_9$ , Cd                                                       |
| Q               | -5.05                   | -0.90                   | -2.71                  | -0.45                   | -0.89                   | $\text{Cd}(\text{GaSe}_2)_2$ , CdSe, $\text{La}_3\text{Ga}_5\text{O}_{12}$ , $\text{La}_4\text{Se}_3\text{O}_4$                             |
| R               | -4.78                   | -0.83                   | -2.88                  | -0.59                   | -0.64                   | $\text{Cd}(\text{GaSe}_2)_2$ , $\text{La}_2\text{SeO}_2$ , $\text{La}_3\text{Ga}_5\text{O}_{12}$ , $\text{La}_4\text{Se}_3\text{O}_4$       |
| S               | -3.96                   | 0                       | -3.36                  | -1.35                   | 0                       | CdSe, $\text{La}_3\text{Ga}_5\text{O}_{12}$ , Cd, Ga                                                                                        |
| T               | -3.88                   | 0                       | -3.37                  | -1.41                   | 0                       | $\text{La}_3\text{Ga}_5\text{O}_{12}$ , $\text{La}_4\text{Ga}_2\text{O}_9$ , Cd, Ga                                                         |
| U               | -3.86                   | 0                       | -3.38                  | -1.42                   | 0                       | $\text{La}_2\text{SeO}_2$ , $\text{La}_4\text{Ga}_2\text{O}_9$ , Cd, Ga                                                                     |
| V               | -3.88                   | -0.02                   | -3.37                  | -1.40                   | 0                       | $\text{La}_2\text{SeO}_2$ , $\text{La}_3\text{Ga}_5\text{O}_{12}$ , $\text{La}_4\text{Ga}_2\text{O}_9$ , Ga                                 |
| W               | -4.51                   | -0.54                   | -3.08                  | -0.82                   | -0.34                   | $\text{Cd}(\text{GaSe}_2)_2$ , CdSe, GaSe, $\text{La}_3\text{Ga}_5\text{O}_{12}$                                                            |
| X               | -4.54                   | -0.68                   | -3.04                  | -0.75                   | -0.41                   | $\text{Cd}(\text{GaSe}_2)_2$ , GaSe, $\text{La}_2\text{SeO}_2$ , $\text{La}_3\text{Ga}_5\text{O}_{12}$                                      |
| Y               | -4.09                   | -0.20                   | -3.32                  | -1.15                   | 0                       | CdSe, GaSe, $\text{La}_3\text{Ga}_5\text{O}_{12}$ , Ga                                                                                      |
| Z               | -4.05                   | -0.27                   | -3.33                  | -1.15                   | 0                       | GaSe, $\text{La}_2\text{SeO}_2$ , $\text{La}_3\text{Ga}_5\text{O}_{12}$ , Ga                                                                |
| AA              | -4.32                   | -0.83                   | -3.34                  | -0.59                   | -0.64                   | $\text{Cd}(\text{GaSe}_2)_2$ , $\text{La}_{10}\text{Se}_{14}\text{O}$ , $\text{La}_2\text{SeO}_2$ , $\text{La}_4\text{Se}_3\text{O}_4$      |

**Table S8** Limits of the chemical potentials at which  $\text{La}_2\text{CdO}_2\text{Se}_2$  exists in the single phase in the La-Cd-O-Se-In quinary system and the competing phases at respective limits, calculated by PBEsol-GGA+ $U$ . The unit of the chemical potential is eV.

| Conditions      | $\Delta\mu_{\text{La}}$ | $\Delta\mu_{\text{Cd}}$ | $\Delta\mu_{\text{O}}$ | $\Delta\mu_{\text{Se}}$ | $\Delta\mu_{\text{In}}$ | Competing phases                                                                                                                            |
|-----------------|-------------------------|-------------------------|------------------------|-------------------------|-------------------------|---------------------------------------------------------------------------------------------------------------------------------------------|
| A (Cation rich) | -3.07                   | 0                       | -4.17                  | -1.42                   | 0                       | $\text{La}_{10}\text{Se}_{14}\text{O}$ , $\text{La}_2\text{SeO}_2$ , Cd, In                                                                 |
| B               | -4.35                   | -0.79                   | -3.36                  | -0.57                   | -0.52                   | $\text{Cd}(\text{InSe}_2)_2$ , CdSe, $\text{La}_{10}\text{Se}_{14}\text{O}$ , $\text{La}_{10}\text{Se}_{19}$                                |
| C               | -3.69                   | -0.35                   | -3.80                  | -1.01                   | 0                       | CdSe, InSe, $\text{La}_{10}\text{Se}_{14}\text{O}$ , In                                                                                     |
| D               | -4.12                   | -0.63                   | -3.51                  | -0.72                   | -0.28                   | $\text{Cd}(\text{InSe}_2)_2$ , CdSe, InSe, $\text{La}_{10}\text{Se}_{14}\text{O}$                                                           |
| E               | -3.17                   | 0                       | -4.14                  | -1.35                   | 0                       | CdSe, $\text{La}_{10}\text{Se}_{14}\text{O}$ , Cd, In                                                                                       |
| F (Anion rich)  | -5.72                   | -0.90                   | -2.05                  | -0.45                   | -1.21                   | CdSe, $\text{In}_2\text{O}_3$ , $\text{La}_2\text{O}_3$ , $\text{La}_4\text{Se}_3\text{O}_4$                                                |
| G               | -5.41                   | -0.83                   | -2.25                  | -0.59                   | -0.90                   | $\text{In}_2\text{O}_3$ , $\text{La}_2\text{O}_3$ , $\text{La}_2\text{SeO}_2$ , $\text{La}_4\text{Se}_3\text{O}_4$                          |
| H               | -4.37                   | 0                       | -2.95                  | -1.35                   | 0                       | CdSe, $\text{La}_2\text{O}_3$ , Cd, In                                                                                                      |
| I               | -4.16                   | 0                       | -3.09                  | -1.42                   | 0                       | $\text{La}_2\text{O}_3$ , $\text{La}_2\text{SeO}_2$ , Cd, In                                                                                |
| J               | -4.57                   | -0.90                   | -3.19                  | -0.45                   | -0.69                   | $\text{Cd}(\text{InSe}_2)_2$ , CdSe, $\text{La}_{10}\text{Se}_{19}$ , $\text{La}_4\text{Se}_3\text{O}_4$                                    |
| K               | -4.52                   | -0.10                   | -2.85                  | -1.25                   | 0                       | CdSe, $\text{In}_2\text{O}_3$ , $\text{La}_2\text{O}_3$ , In                                                                                |
| L               | -4.52                   | -0.24                   | -2.85                  | -1.18                   | 0                       | $\text{In}_2\text{O}_3$ , $\text{La}_2\text{O}_3$ , $\text{La}_2\text{SeO}_2$ , In                                                          |
| M               | -5.38                   | -0.90                   | -2.39                  | -0.45                   | -0.69                   | $\text{Cd}(\text{InSe}_2)_2$ , CdSe, $\text{In}_2\text{O}_3$ , $\text{La}_4\text{Se}_3\text{O}_4$                                           |
| N               | -5.12                   | -0.83                   | -2.55                  | -0.59                   | -0.45                   | $\text{Cd}(\text{InSe}_2)_2$ , $\text{In}_2\text{O}_3$ , $\text{La}_2\text{SeO}_2$ , $\text{La}_4\text{Se}_3\text{O}_4$                     |
| O               | -4.64                   | -0.35                   | -2.85                  | -1.01                   | 0                       | CdSe, $\text{In}_2\text{O}_3$ , InSe, In                                                                                                    |
| P               | -4.60                   | -0.41                   | -2.85                  | -1.01                   | 0                       | $\text{In}_2\text{O}_3$ , InSe, $\text{La}_2\text{SeO}_2$ , In                                                                              |
| Q               | -4.97                   | -0.63                   | -2.66                  | -0.72                   | -0.28                   | $\text{Cd}(\text{InSe}_2)_2$ , CdSe, $\text{In}_2\text{O}_3$ , InSe                                                                         |
| R               | -5.02                   | -0.77                   | -2.61                  | -0.65                   | -0.35                   | $\text{Cd}(\text{InSe}_2)_2$ , $\text{In}_2\text{O}_3$ , InSe, $\text{La}_2\text{SeO}_2$                                                    |
| S               | -4.32                   | -0.83                   | -3.34                  | -0.59                   | -0.45                   | $\text{Cd}(\text{InSe}_2)_2$ , $\text{La}_{10}\text{Se}_{14}\text{O}$ , $\text{La}_2\text{SeO}_2$ , $\text{La}_4\text{Se}_3\text{O}_4$      |
| T               | -4.36                   | -0.85                   | -3.32                  | -0.56                   | -0.50                   | $\text{Cd}(\text{InSe}_2)_2$ , $\text{La}_{10}\text{Se}_{14}\text{O}$ , $\text{La}_{10}\text{Se}_{19}$ , $\text{La}_4\text{Se}_3\text{O}_4$ |
| U               | -3.69                   | -0.41                   | -3.76                  | -1.01                   | 0                       | InSe, $\text{La}_{10}\text{Se}_{14}\text{O}$ , $\text{La}_2\text{SeO}_2$ , In                                                               |
| V               | -4.22                   | -0.77                   | -3.41                  | -0.65                   | -0.35                   | $\text{Cd}(\text{InSe}_2)_2$ , InSe, $\text{La}_{10}\text{Se}_{14}\text{O}$ , $\text{La}_2\text{SeO}_2$                                     |

**Table S9** Limits of the chemical potentials at which  $\text{La}_2\text{CdO}_2\text{Se}_2$  exists in the single phase in the La-Cd-O-Se-Mg quinary system and the competing phases at respective limits, calculated by PBEsol-GGA+ $U$ . The unit of the chemical potential is eV.

| Conditions      | $\Delta\mu_{\text{La}}$ | $\Delta\mu_{\text{Cd}}$ | $\Delta\mu_{\text{O}}$ | $\Delta\mu_{\text{Se}}$ | $\Delta\mu_{\text{Mg}}$ | Competing phases                                                                                                   |
|-----------------|-------------------------|-------------------------|------------------------|-------------------------|-------------------------|--------------------------------------------------------------------------------------------------------------------|
| A               | -4.32                   | -0.83                   | -3.34                  | -0.59                   | -2.32                   | $\text{La}_{10}\text{Se}_{14}\text{O}$ , $\text{La}_2\text{SeO}_2$ , $\text{La}_4\text{Se}_3\text{O}_4$ , MgO      |
| B (Anion rich)  | -5.72                   | -0.90                   | -2.05                  | -0.45                   | -3.62                   | CdSe, $\text{La}_2\text{O}_3$ , $\text{La}_4\text{Se}_3\text{O}_4$ , MgO                                           |
| C               | -5.41                   | -0.83                   | -2.25                  | -0.59                   | -3.41                   | $\text{La}_2\text{O}_3$ , $\text{La}_2\text{SeO}_2$ , $\text{La}_4\text{Se}_3\text{O}_4$ , MgO                     |
| D               | -3.17                   | 0                       | -4.14                  | -1.35                   | -1.52                   | CdSe, $\text{La}_{10}\text{Se}_{14}\text{O}$ , MgO, Cd                                                             |
| E (Cation rich) | -3.07                   | 0                       | -4.17                  | -1.42                   | -1.49                   | $\text{La}_{10}\text{Se}_{14}\text{O}$ , $\text{La}_2\text{SeO}_2$ , MgO, Cd                                       |
| F               | -4.57                   | -0.90                   | -3.19                  | -0.45                   | -2.47                   | CdSe, $\text{La}_{10}\text{Se}_{19}$ , $\text{La}_4\text{Se}_3\text{O}_4$ , MgO                                    |
| G               | -4.35                   | -0.79                   | -3.36                  | -0.57                   | -2.30                   | CdSe, $\text{La}_{10}\text{Se}_{14}\text{O}$ , $\text{La}_{10}\text{Se}_{19}$ , MgO                                |
| H               | -4.36                   | -0.85                   | -3.32                  | -0.56                   | -2.34                   | $\text{La}_{10}\text{Se}_{14}\text{O}$ , $\text{La}_{10}\text{Se}_{19}$ , $\text{La}_4\text{Se}_3\text{O}_4$ , MgO |
| I               | -4.37                   | 0                       | -2.95                  | -1.35                   | -2.71                   | CdSe, $\text{La}_2\text{O}_3$ , MgO, Cd                                                                            |
| J               | -4.16                   | 0                       | -3.09                  | -1.42                   | -2.57                   | $\text{La}_2\text{O}_3$ , $\text{La}_2\text{SeO}_2$ , MgO, Cd                                                      |

**Table S10** Limits of the chemical potentials at which  $\text{La}_2\text{CdO}_2\text{Se}_2$  exists in the single phase in the La-Cd-O-Se-Ca quinary system and the competing phases at respective limits, calculated by PBEsol-GGA+ $U$ . The unit of the chemical potential is eV.

| Conditions      | $\Delta\mu_{\text{La}}$ | $\Delta\mu_{\text{Cd}}$ | $\Delta\mu_{\text{O}}$ | $\Delta\mu_{\text{Se}}$ | $\Delta\mu_{\text{Ca}}$ | Competing phases                                                                                                   |
|-----------------|-------------------------|-------------------------|------------------------|-------------------------|-------------------------|--------------------------------------------------------------------------------------------------------------------|
| A (Anion rich)  | -5.72                   | -0.90                   | -2.05                  | -0.45                   | -4.13                   | CaO, CdSe, $\text{La}_2\text{O}_3$ , $\text{La}_4\text{Se}_3\text{O}_4$                                            |
| B               | -5.41                   | -0.83                   | -2.25                  | -0.59                   | -3.92                   | CaO, $\text{La}_2\text{O}_3$ , $\text{La}_2\text{SeO}_2$ , $\text{La}_4\text{Se}_3\text{O}_4$                      |
| C               | -4.37                   | 0                       | -2.95                  | -1.35                   | -3.22                   | CaO, CdSe, $\text{La}_2\text{O}_3$ , Cd                                                                            |
| D               | -4.16                   | 0                       | -3.09                  | -1.42                   | -3.09                   | CaO, $\text{La}_2\text{O}_3$ , $\text{La}_2\text{SeO}_2$ , Cd                                                      |
| E               | -4.57                   | -0.90                   | -3.19                  | -0.45                   | -3.70                   | CaSe, CdSe, $\text{La}_{10}\text{Se}_{19}$ , $\text{La}_4\text{Se}_3\text{O}_4$                                    |
| F               | -5.29                   | -0.90                   | -2.47                  | -0.45                   | -3.70                   | CaO, CaSe, CdSe, $\text{La}_4\text{Se}_3\text{O}_4$                                                                |
| G               | -5.05                   | -0.83                   | -2.61                  | -0.59                   | -3.56                   | CaO, CaSe, $\text{La}_2\text{SeO}_2$ , $\text{La}_4\text{Se}_3\text{O}_4$                                          |
| H               | -3.94                   | 0                       | -3.38                  | -1.35                   | -2.80                   | CaO, CaSe, CdSe, Cd                                                                                                |
| I               | -3.80                   | 0                       | -3.45                  | -1.42                   | -2.73                   | CaO, CaSe, $\text{La}_2\text{SeO}_2$ , Cd                                                                          |
| J               | -4.32                   | -0.83                   | -3.34                  | -0.59                   | -3.56                   | CaSe, $\text{La}_{10}\text{Se}_{14}\text{O}$ , $\text{La}_2\text{SeO}_2$ , $\text{La}_4\text{Se}_3\text{O}_4$      |
| K               | -4.36                   | -0.85                   | -3.32                  | -0.56                   | -3.59                   | CaSe, $\text{La}_{10}\text{Se}_{14}\text{O}$ , $\text{La}_{10}\text{Se}_{19}$ , $\text{La}_4\text{Se}_3\text{O}_4$ |
| L (Cation rich) | -3.07                   | 0                       | -4.17                  | -1.42                   | -2.73                   | CaSe, $\text{La}_{10}\text{Se}_{14}\text{O}$ , $\text{La}_2\text{SeO}_2$ , Cd                                      |
| M               | -4.35                   | -0.79                   | -3.36                  | -0.57                   | -3.58                   | CaSe, CdSe, $\text{La}_{10}\text{Se}_{14}\text{O}$ , $\text{La}_{10}\text{Se}_{19}$                                |
| N               | -3.17                   | 0                       | -4.14                  | -1.35                   | -2.80                   | CaSe, CdSe, $\text{La}_{10}\text{Se}_{14}\text{O}$ , Cd                                                            |

**Table S11** Limits of the chemical potentials at which  $\text{La}_2\text{CdO}_2\text{Se}_2$  exists in the single phase in the La-Cd-O-Se-Sr quinary system and the competing phases at respective limits, calculated by PBEsol-GGA+ $U$ . The unit of the chemical potential is eV.

| Conditions      | $\Delta\mu_{\text{La}}$ | $\Delta\mu_{\text{Cd}}$ | $\Delta\mu_{\text{O}}$ | $\Delta\mu_{\text{Se}}$ | $\Delta\mu_{\text{Sr}}$ | Competing phases                                                                                                                            |
|-----------------|-------------------------|-------------------------|------------------------|-------------------------|-------------------------|---------------------------------------------------------------------------------------------------------------------------------------------|
| A               | -4.32                   | -0.83                   | -3.34                  | -0.59                   | -3.72                   | $\text{La}_{10}\text{Se}_{14}\text{O}$ , $\text{La}_2\text{SeO}_2$ , $\text{La}_4\text{Se}_3\text{O}_4$ , $\text{Sr}(\text{LaSe}_2)_2$      |
| B               | -3.17                   | 0                       | -4.14                  | -1.35                   | -2.96                   | CdSe, $\text{La}_{10}\text{Se}_{14}\text{O}$ , $\text{Sr}(\text{LaSe}_2)_2$ , Cd                                                            |
| C (Cation rich) | -3.07                   | 0                       | -4.17                  | -1.42                   | -2.89                   | $\text{La}_{10}\text{Se}_{14}\text{O}$ , $\text{La}_2\text{SeO}_2$ , $\text{Sr}(\text{LaSe}_2)_2$ , Cd                                      |
| D (Anion rich)  | -5.72                   | -0.90                   | -2.05                  | -0.45                   | -3.74                   | CdSe, $\text{La}_2\text{O}_3$ , $\text{La}_4\text{Se}_3\text{O}_4$ , SrSe                                                                   |
| E               | -5.41                   | -0.83                   | -2.25                  | -0.59                   | -3.60                   | $\text{La}_2\text{O}_3$ , $\text{La}_2\text{SeO}_2$ , $\text{La}_4\text{Se}_3\text{O}_4$ , SrSe                                             |
| F               | -4.35                   | -0.79                   | -3.36                  | -0.57                   | -3.75                   | CdSe, $\text{La}_{10}\text{Se}_{14}\text{O}$ , $\text{La}_{10}\text{Se}_{19}$ , $\text{Sr}(\text{LaSe}_2)_2$                                |
| G               | -4.57                   | -0.90                   | -3.19                  | -0.45                   | -3.77                   | CdSe, $\text{La}_{10}\text{Se}_{19}$ , $\text{La}_4\text{Se}_3\text{O}_4$ , $\text{Sr}(\text{LaSe}_2)_2$                                    |
| H               | -4.36                   | -0.85                   | -3.32                  | -0.56                   | -3.75                   | $\text{La}_{10}\text{Se}_{14}\text{O}$ , $\text{La}_{10}\text{Se}_{19}$ , $\text{La}_4\text{Se}_3\text{O}_4$ , $\text{Sr}(\text{LaSe}_2)_2$ |
| I               | -4.59                   | -0.90                   | -3.18                  | -0.45                   | -3.74                   | CdSe, $\text{La}_4\text{Se}_3\text{O}_4$ , $\text{Sr}(\text{LaSe}_2)_2$ , SrSe                                                              |
| J               | -4.38                   | -0.83                   | -3.28                  | -0.59                   | -3.60                   | $\text{La}_2\text{SeO}_2$ , $\text{La}_4\text{Se}_3\text{O}_4$ , $\text{Sr}(\text{LaSe}_2)_2$ , SrSe                                        |
| K               | -4.37                   | 0                       | -2.95                  | -1.35                   | -2.84                   | CdSe, $\text{La}_2\text{O}_3$ , SrSe, Cd                                                                                                    |
| L               | -4.16                   | 0                       | -3.09                  | -1.42                   | -2.77                   | $\text{La}_2\text{O}_3$ , $\text{La}_2\text{SeO}_2$ , SrSe, Cd                                                                              |
| M               | -3.23                   | 0                       | -4.08                  | -1.35                   | -2.84                   | CdSe, $\text{Sr}(\text{LaSe}_2)_2$ , SrSe, Cd                                                                                               |
| N               | -3.13                   | 0                       | -4.12                  | -1.42                   | -2.77                   | $\text{La}_2\text{SeO}_2$ , $\text{Sr}(\text{LaSe}_2)_2$ , SrSe, Cd                                                                         |

**Table S12** Limits of the chemical potentials at which  $\text{La}_2\text{CdO}_2\text{Se}_2$  exists in the single phase in the La-Cd-O-Se-Ba quinary system and the competing phases at respective limits, calculated by PBEsol-GGA+ $U$ . The unit of the chemical potential is eV.

| Conditions      | $\Delta\mu_{\text{La}}$ | $\Delta\mu_{\text{Cd}}$ | $\Delta\mu_{\text{O}}$ | $\Delta\mu_{\text{Se}}$ | $\Delta\mu_{\text{Ba}}$ | Competing phases                                                                                                   |
|-----------------|-------------------------|-------------------------|------------------------|-------------------------|-------------------------|--------------------------------------------------------------------------------------------------------------------|
| A (Anion rich)  | -5.72                   | -0.90                   | -2.05                  | -0.45                   | -3.66                   | BaSe, CdSe, $\text{La}_2\text{O}_3$ , $\text{La}_4\text{Se}_3\text{O}_4$                                           |
| B               | -5.41                   | -0.83                   | -2.25                  | -0.59                   | -3.52                   | BaSe, $\text{La}_2\text{O}_3$ , $\text{La}_2\text{SeO}_2$ , $\text{La}_4\text{Se}_3\text{O}_4$                     |
| C               | -4.37                   | 0                       | -2.95                  | -1.35                   | -2.76                   | BaSe, CdSe, $\text{La}_2\text{O}_3$ , Cd                                                                           |
| D               | -4.16                   | 0                       | -3.09                  | -1.42                   | -2.69                   | BaSe, $\text{La}_2\text{O}_3$ , $\text{La}_2\text{SeO}_2$ , Cd                                                     |
| E               | -4.32                   | -0.83                   | -3.34                  | -0.59                   | -3.52                   | BaSe, $\text{La}_{10}\text{Se}_{14}\text{O}$ , $\text{La}_2\text{SeO}_2$ , $\text{La}_4\text{Se}_3\text{O}_4$      |
| F               | -3.17                   | 0                       | -4.14                  | -1.35                   | -2.76                   | BaSe, CdSe, $\text{La}_{10}\text{Se}_{14}\text{O}$ , Cd                                                            |
| G (Cation rich) | -3.07                   | 0                       | -4.17                  | -1.42                   | -2.69                   | BaSe, $\text{La}_{10}\text{Se}_{14}\text{O}$ , $\text{La}_2\text{SeO}_2$ , Cd                                      |
| H               | -4.35                   | -0.79                   | -3.36                  | -0.57                   | -3.54                   | BaSe, CdSe, $\text{La}_{10}\text{Se}_{14}\text{O}$ , $\text{La}_{10}\text{Se}_{19}$                                |
| I               | -4.57                   | -0.90                   | -3.19                  | -0.45                   | -3.66                   | BaSe, CdSe, $\text{La}_{10}\text{Se}_{19}$ , $\text{La}_4\text{Se}_3\text{O}_4$                                    |
| J               | -4.36                   | -0.85                   | -3.32                  | -0.56                   | -3.55                   | BaSe, $\text{La}_{10}\text{Se}_{14}\text{O}$ , $\text{La}_{10}\text{Se}_{19}$ , $\text{La}_4\text{Se}_3\text{O}_4$ |



**Table S13** Limits of the chemical potentials at which  $\text{La}_2\text{CdO}_2\text{Se}_2$  exists in the single phase in the La-Cd-O-Se-Li quinary system and the competing phases at respective limits, calculated by PBEsol-GGA+ $U$ . The unit of the chemical potential is eV.

| Conditions      | $\Delta\mu_{\text{La}}$ | $\Delta\mu_{\text{Cd}}$ | $\Delta\mu_{\text{O}}$ | $\Delta\mu_{\text{Se}}$ | $\Delta\mu_{\text{Li}}$ | Competing phases                                                                                                                      |
|-----------------|-------------------------|-------------------------|------------------------|-------------------------|-------------------------|---------------------------------------------------------------------------------------------------------------------------------------|
| A               | -4.32                   | -0.83                   | -3.34                  | -0.59                   | -1.61                   | $\text{La}_{10}\text{Se}_{14}\text{O}$ , $\text{La}_2\text{SeO}_2$ , $\text{La}_4\text{Se}_3\text{O}_4$ , $\text{Li}_2\text{Se}$      |
| B               | -3.17                   | 0                       | -4.14                  | -1.35                   | -1.23                   | $\text{CdSe}$ , $\text{La}_{10}\text{Se}_{14}\text{O}$ , $\text{Li}_2\text{Se}$ , $\text{Cd}$                                         |
| C (Cation rich) | -3.07                   | 0                       | -4.17                  | -1.42                   | -1.19                   | $\text{La}_{10}\text{Se}_{14}\text{O}$ , $\text{La}_2\text{SeO}_2$ , $\text{Li}_2\text{Se}$ , $\text{Cd}$                             |
| D (Anion rich)  | -5.72                   | -0.90                   | -2.05                  | -0.45                   | -1.80                   | $\text{CdSe}$ , $\text{La}_2\text{O}_3$ , $\text{La}_4\text{Se}_3\text{O}_4$ , $\text{Li}_2\text{O}$                                  |
| E               | -5.41                   | -0.83                   | -2.25                  | -0.59                   | -1.70                   | $\text{La}_2\text{O}_3$ , $\text{La}_2\text{SeO}_2$ , $\text{La}_4\text{Se}_3\text{O}_4$ , $\text{Li}_2\text{O}$                      |
| F               | -4.35                   | -0.79                   | -3.36                  | -0.57                   | -1.62                   | $\text{CdSe}$ , $\text{La}_{10}\text{Se}_{14}\text{O}$ , $\text{La}_{10}\text{Se}_{19}$ , $\text{Li}_2\text{Se}$                      |
| G               | -4.57                   | -0.90                   | -3.19                  | -0.45                   | -1.68                   | $\text{CdSe}$ , $\text{La}_{10}\text{Se}_{19}$ , $\text{La}_4\text{Se}_3\text{O}_4$ , $\text{Li}_2\text{Se}$                          |
| H               | -4.36                   | -0.85                   | -3.32                  | -0.56                   | -1.62                   | $\text{La}_{10}\text{Se}_{14}\text{O}$ , $\text{La}_{10}\text{Se}_{19}$ , $\text{La}_4\text{Se}_3\text{O}_4$ , $\text{Li}_2\text{Se}$ |
| I               | -5.48                   | -0.90                   | -2.29                  | -0.45                   | -1.68                   | $\text{CdSe}$ , $\text{La}_4\text{Se}_3\text{O}_4$ , $\text{Li}_2\text{O}$ , $\text{Li}_2\text{Se}$                                   |
| J               | -5.23                   | -0.83                   | -2.43                  | -0.59                   | -1.61                   | $\text{La}_2\text{SeO}_2$ , $\text{La}_4\text{Se}_3\text{O}_4$ , $\text{Li}_2\text{O}$ , $\text{Li}_2\text{Se}$                       |
| K               | -4.37                   | 0                       | -2.95                  | -1.35                   | -1.35                   | $\text{CdSe}$ , $\text{La}_2\text{O}_3$ , $\text{Li}_2\text{O}$ , $\text{Cd}$                                                         |
| L               | -4.16                   | 0                       | -3.09                  | -1.42                   | -1.28                   | $\text{La}_2\text{O}_3$ , $\text{La}_2\text{SeO}_2$ , $\text{Li}_2\text{O}$ , $\text{Cd}$                                             |
| M               | -4.12                   | 0                       | -3.19                  | -1.35                   | -1.23                   | $\text{CdSe}$ , $\text{Li}_2\text{O}$ , $\text{Li}_2\text{Se}$ , $\text{Cd}$                                                          |
| N               | -3.98                   | 0                       | -3.26                  | -1.42                   | -1.19                   | $\text{La}_2\text{SeO}_2$ , $\text{Li}_2\text{O}$ , $\text{Li}_2\text{Se}$ , $\text{Cd}$                                              |

**Table S14** Limits of the chemical potentials at which  $\text{La}_2\text{CdO}_2\text{Se}_2$  exists in the single phase in the La-Cd-O-Se-Na quinary system and the competing phases at respective limits, calculated by PBEsol-GGA+ $U$ . The unit of the chemical potential is eV.

| Conditions      | $\Delta\mu_{\text{La}}$ | $\Delta\mu_{\text{Cd}}$ | $\Delta\mu_{\text{O}}$ | $\Delta\mu_{\text{Se}}$ | $\Delta\mu_{\text{Na}}$ | Competing phases                                                                                                                 |
|-----------------|-------------------------|-------------------------|------------------------|-------------------------|-------------------------|----------------------------------------------------------------------------------------------------------------------------------|
| A               | -3.26                   | 0                       | -4.05                  | -1.35                   | -1.05                   | $\text{CdSe}$ , $\text{Na}_4\text{Cd}_3\text{Se}_5$ , $\text{NaLaSe}_2$ , $\text{Cd}$                                            |
| B               | -4.37                   | 0                       | -2.95                  | -1.35                   | -1.05                   | $\text{CdSe}$ , $\text{La}_2\text{O}_3$ , $\text{Na}_4\text{Cd}_3\text{Se}_5$ , $\text{Cd}$                                      |
| C               | -3.21                   | 0                       | -4.04                  | -1.42                   | -0.97                   | $\text{La}_2\text{SeO}_2$ , $\text{Na}_4\text{Cd}_3\text{Se}_5$ , $\text{NaLaSe}_2$ , $\text{Cd}$                                |
| D               | -4.16                   | 0                       | -3.09                  | -1.42                   | -0.97                   | $\text{La}_2\text{O}_3$ , $\text{La}_2\text{SeO}_2$ , $\text{Na}_4\text{Cd}_3\text{Se}_5$ , $\text{Cd}$                          |
| E (Cation rich) | -3.07                   | 0                       | -4.17                  | -1.42                   | -1.11                   | $\text{La}_{10}\text{Se}_{14}\text{O}$ , $\text{La}_2\text{SeO}_2$ , $\text{NaLaSe}_2$ , $\text{Cd}$                             |
| F               | -4.35                   | -0.79                   | -3.36                  | -0.57                   | -1.54                   | $\text{CdSe}$ , $\text{La}_{10}\text{Se}_{14}\text{O}$ , $\text{La}_{10}\text{Se}_{19}$ , $\text{NaLaSe}_2$                      |
| G               | -3.17                   | 0                       | -4.14                  | -1.35                   | -1.15                   | $\text{CdSe}$ , $\text{La}_{10}\text{Se}_{14}\text{O}$ , $\text{NaLaSe}_2$ , $\text{Cd}$                                         |
| H               | -4.32                   | -0.83                   | -3.34                  | -0.59                   | -1.52                   | $\text{La}_{10}\text{Se}_{14}\text{O}$ , $\text{La}_2\text{SeO}_2$ , $\text{La}_4\text{Se}_3\text{O}_4$ , $\text{NaLaSe}_2$      |
| I               | -4.36                   | -0.85                   | -3.32                  | -0.56                   | -1.54                   | $\text{La}_{10}\text{Se}_{14}\text{O}$ , $\text{La}_{10}\text{Se}_{19}$ , $\text{La}_4\text{Se}_3\text{O}_4$ , $\text{NaLaSe}_2$ |
| J               | -4.46                   | -0.83                   | -3.20                  | -0.59                   | -1.38                   | $\text{La}_2\text{SeO}_2$ , $\text{La}_4\text{Se}_3\text{O}_4$ , $\text{Na}_4\text{Cd}_3\text{Se}_5$ , $\text{NaLaSe}_2$         |
| K               | -4.57                   | -0.90                   | -3.19                  | -0.45                   | -1.55                   | $\text{CdSe}$ , $\text{La}_{10}\text{Se}_{19}$ , $\text{La}_4\text{Se}_3\text{O}_4$ , $\text{NaLaSe}_2$                          |
| L               | -4.62                   | -0.90                   | -3.15                  | -0.45                   | -1.51                   | $\text{CdSe}$ , $\text{La}_4\text{Se}_3\text{O}_4$ , $\text{Na}_4\text{Cd}_3\text{Se}_5$ , $\text{NaLaSe}_2$                     |
| M               | -5.41                   | -0.83                   | -2.25                  | -0.59                   | -1.38                   | $\text{La}_2\text{O}_3$ , $\text{La}_2\text{SeO}_2$ , $\text{La}_4\text{Se}_3\text{O}_4$ , $\text{Na}_4\text{Cd}_3\text{Se}_5$   |
| N (Anion rich)  | -5.72                   | -0.90                   | -2.05                  | -0.45                   | -1.51                   | $\text{CdSe}$ , $\text{La}_2\text{O}_3$ , $\text{La}_4\text{Se}_3\text{O}_4$ , $\text{Na}_4\text{Cd}_3\text{Se}_5$               |

**Table S15** Limits of the chemical potentials at which  $\text{La}_2\text{CdO}_2\text{Se}_2$  exists in the single phase in the La-Cd-O-Se-K quinary system and the competing phases at respective limits, calculated by PBEsol-GGA+ $U$ . The unit of the chemical potential is eV.

| Conditions      | $\Delta\mu_{\text{La}}$ | $\Delta\mu_{\text{Cd}}$ | $\Delta\mu_{\text{O}}$ | $\Delta\mu_{\text{Se}}$ | $\Delta\mu_{\text{K}}$ | Competing phases                                                                                                                                  |
|-----------------|-------------------------|-------------------------|------------------------|-------------------------|------------------------|---------------------------------------------------------------------------------------------------------------------------------------------------|
| A (Anion rich)  | -5.72                   | -0.90                   | -2.05                  | -0.45                   | -1.75                  | $\text{CdSe}$ , $\text{K}_2\text{Cd}_3\text{Se}_4$ , $\text{La}_2\text{O}_3$ , $\text{La}_4\text{Se}_3\text{O}_4$                                 |
| B               | -5.41                   | -0.83                   | -2.25                  | -0.59                   | -1.57                  | $\text{K}_2\text{Cd}_3\text{Se}_4$ , $\text{La}_2\text{O}_3$ , $\text{La}_2\text{SeO}_2$ , $\text{La}_4\text{Se}_3\text{O}_4$                     |
| C               | -4.37                   | 0                       | -2.95                  | -1.35                   | -1.29                  | $\text{CdSe}$ , $\text{K}_2\text{Cd}_3\text{Se}_4$ , $\text{La}_2\text{O}_3$ , $\text{Cd}$                                                        |
| D               | -4.16                   | 0                       | -3.09                  | -1.42                   | -1.16                  | $\text{K}_2\text{Cd}_3\text{Se}_4$ , $\text{La}_2\text{O}_3$ , $\text{La}_2\text{SeO}_2$ , $\text{Cd}$                                            |
| E               | -4.57                   | -0.90                   | -3.19                  | -0.45                   | -1.75                  | $\text{CdSe}$ , $\text{K}_2\text{Cd}_3\text{Se}_4$ , $\text{La}_{10}\text{Se}_{19}$ , $\text{La}_4\text{Se}_3\text{O}_4$                          |
| F               | -4.32                   | -0.83                   | -3.34                  | -0.59                   | -1.57                  | $\text{K}_2\text{Cd}_3\text{Se}_4$ , $\text{La}_{10}\text{Se}_{14}\text{O}$ , $\text{La}_2\text{SeO}_2$ , $\text{La}_4\text{Se}_3\text{O}_4$      |
| G               | -4.36                   | -0.85                   | -3.32                  | -0.56                   | -1.61                  | $\text{K}_2\text{Cd}_3\text{Se}_4$ , $\text{La}_{10}\text{Se}_{14}\text{O}$ , $\text{La}_{10}\text{Se}_{19}$ , $\text{La}_4\text{Se}_3\text{O}_4$ |
| H (Cation rich) | -3.07                   | 0                       | -4.17                  | -1.42                   | -1.16                  | $\text{K}_2\text{Cd}_3\text{Se}_4$ , $\text{La}_{10}\text{Se}_{14}\text{O}$ , $\text{La}_2\text{SeO}_2$ , $\text{Cd}$                             |
| I               | -4.35                   | -0.79                   | -3.36                  | -0.57                   | -1.69                  | $\text{CdSe}$ , $\text{K}_2\text{Cd}_3\text{Se}_4$ , $\text{La}_{10}\text{Se}_{14}\text{O}$ , $\text{La}_{10}\text{Se}_{19}$                      |
| J               | -3.17                   | 0                       | -4.14                  | -1.35                   | -1.29                  | $\text{CdSe}$ , $\text{K}_2\text{Cd}_3\text{Se}_4$ , $\text{La}_{10}\text{Se}_{14}\text{O}$ , $\text{Cd}$                                         |

**Table S16** Limits of the chemical potentials at which  $\text{La}_2\text{CdO}_2\text{Se}_2$  exists in the single phase in the La-Cd-O-Se-Rb quinary system and the competing phases at respective limits, calculated by PBEsol-GGA+ $U$ . The unit of the chemical potential is eV.

| Conditions      | $\Delta\mu_{\text{La}}$ | $\Delta\mu_{\text{Cd}}$ | $\Delta\mu_{\text{O}}$ | $\Delta\mu_{\text{Se}}$ | $\Delta\mu_{\text{Rb}}$ | Competing phases                                                                                                                        |
|-----------------|-------------------------|-------------------------|------------------------|-------------------------|-------------------------|-----------------------------------------------------------------------------------------------------------------------------------------|
| A               | -4.36                   | -0.79                   | -3.35                  | -0.56                   | -1.74                   | CdSe, $\text{La}_{10}\text{Se}_{19}$ , $\text{Rb}_2\text{Cd}_3\text{Se}_4$ , $\text{RbLaSe}_2$                                          |
| B               | -3.18                   | 0                       | -4.14                  | -1.35                   | -1.34                   | CdSe, $\text{Rb}_2\text{Cd}_3\text{Se}_4$ , $\text{RbLaSe}_2$ , Cd                                                                      |
| C               | -3.18                   | 0                       | -4.07                  | -1.42                   | -1.20                   | $\text{La}_2\text{SeO}_2$ , $\text{Rb}_2\text{Cd}_3\text{Se}_4$ , $\text{RbLaSe}_2$ , Cd                                                |
| D               | -4.37                   | 0                       | -2.95                  | -1.35                   | -1.34                   | CdSe, $\text{La}_2\text{O}_3$ , $\text{Rb}_2\text{Cd}_3\text{Se}_4$ , Cd                                                                |
| E               | -4.16                   | 0                       | -3.09                  | -1.42                   | -1.20                   | $\text{La}_2\text{O}_3$ , $\text{La}_2\text{SeO}_2$ , $\text{Rb}_2\text{Cd}_3\text{Se}_4$ , Cd                                          |
| F               | -4.50                   | -0.88                   | -3.24                  | -0.49                   | -1.74                   | $\text{La}_{10}\text{Se}_{19}$ , $\text{La}_4\text{Se}_3\text{O}_4$ , $\text{Rb}_2\text{Cd}_3\text{Se}_4$ , $\text{RbLaSe}_2$           |
| G               | -4.43                   | -0.83                   | -3.24                  | -0.59                   | -1.62                   | $\text{La}_2\text{SeO}_2$ , $\text{La}_4\text{Se}_3\text{O}_4$ , $\text{Rb}_2\text{Cd}_3\text{Se}_4$ , $\text{RbLaSe}_2$                |
| H               | -4.57                   | -0.90                   | -3.19                  | -0.45                   | -1.79                   | CdSe, $\text{La}_{10}\text{Se}_{19}$ , $\text{La}_4\text{Se}_3\text{O}_4$ , $\text{Rb}_2\text{Cd}_3\text{Se}_4$                         |
| I               | -5.41                   | -0.83                   | -2.25                  | -0.59                   | -1.62                   | $\text{La}_2\text{O}_3$ , $\text{La}_2\text{SeO}_2$ , $\text{La}_4\text{Se}_3\text{O}_4$ , $\text{Rb}_2\text{Cd}_3\text{Se}_4$          |
| J (Anion rich)  | -5.72                   | -0.90                   | -2.05                  | -0.45                   | -1.79                   | CdSe, $\text{La}_2\text{O}_3$ , $\text{La}_4\text{Se}_3\text{O}_4$ , $\text{Rb}_2\text{Cd}_3\text{Se}_4$                                |
| K (Cation rich) | -3.07                   | 0                       | -4.17                  | -1.42                   | -1.31                   | $\text{La}_{10}\text{Se}_{14}\text{O}$ , $\text{La}_2\text{SeO}_2$ , $\text{RbLaSe}_2$ , Cd                                             |
| L               | -3.17                   | 0                       | -4.14                  | -1.35                   | -1.34                   | CdSe, $\text{La}_{10}\text{Se}_{14}\text{O}$ , $\text{Rb}_2\text{Cd}_3\text{Se}_4$ , $\text{RbLaSe}_2$ , Cd                             |
| M               | -4.35                   | -0.79                   | -3.36                  | -0.57                   | -1.74                   | CdSe, $\text{La}_{10}\text{Se}_{14}\text{O}$ , $\text{La}_{10}\text{Se}_{19}$ , $\text{Rb}_2\text{Cd}_3\text{Se}_4$ , $\text{RbLaSe}_2$ |
| N               | -4.36                   | -0.85                   | -3.32                  | -0.56                   | -1.74                   | $\text{La}_{10}\text{Se}_{14}\text{O}$ , $\text{La}_{10}\text{Se}_{19}$ , $\text{La}_4\text{Se}_3\text{O}_4$ , $\text{RbLaSe}_2$        |
| O               | -4.32                   | -0.83                   | -3.34                  | -0.59                   | -1.72                   | $\text{La}_{10}\text{Se}_{14}\text{O}$ , $\text{La}_2\text{SeO}_2$ , $\text{La}_4\text{Se}_3\text{O}_4$ , $\text{RbLaSe}_2$             |

**Table S17** Limits of the chemical potentials at which  $\text{La}_2\text{CdO}_2\text{Se}_2$  exists in the single phase in the La-Cd-O-Se-Zr quinary system and the competing phases at respective limits. The unit of the chemical potential is eV.

| Conditions      | $\Delta\mu_{\text{La}}$ | $\Delta\mu_{\text{Cd}}$ | $\Delta\mu_{\text{O}}$ | $\Delta\mu_{\text{Se}}$ | $\Delta\mu_{\text{Zr}}$ | Competing phases                                                                                                              |
|-----------------|-------------------------|-------------------------|------------------------|-------------------------|-------------------------|-------------------------------------------------------------------------------------------------------------------------------|
| A               | -3.47                   | 0                       | -4.06                  | -1.51                   | -2.84                   | CdSe, $\text{La}_{10}\text{Se}_{14}\text{O}$ , $\text{ZrO}_2$ , Cd                                                            |
| B (Cation rich) | -3.45                   | 0                       | -4.07                  | -1.52                   | -2.83                   | $\text{La}_{10}\text{Se}_{14}\text{O}$ , $\text{La}_2\text{SeO}_2$ , $\text{ZrO}_2$ , Cd                                      |
| C               | -3.66                   | 0                       | -3.87                  | -1.52                   | -3.23                   | $\text{La}_2\text{SeO}_2$ , $\text{La}_2\text{Zr}_2\text{O}_7$ , $\text{ZrO}_2$ , Cd                                          |
| D               | -4.57                   | 0                       | -2.95                  | -1.52                   | -5.53                   | $\text{La}_2\text{O}_3$ , $\text{La}_2\text{SeO}_2$ , $\text{La}_2\text{Zr}_2\text{O}_7$ , Cd                                 |
| E               | -3.68                   | 0                       | -3.85                  | -1.51                   | -3.27                   | CdSe, $\text{La}_2\text{Zr}_2\text{O}_7$ , $\text{ZrO}_2$ , Cd                                                                |
| F               | -4.60                   | 0                       | -2.93                  | -1.51                   | -5.56                   | CdSe, $\text{La}_2\text{O}_3$ , $\text{La}_2\text{Zr}_2\text{O}_7$ , Cd                                                       |
| G               | -5.08                   | -1.08                   | -2.99                  | -0.44                   | -4.99                   | $\text{La}_{10}\text{Se}_{14}\text{O}$ , $\text{La}_2\text{SeO}_2$ , $\text{La}_4\text{Se}_3\text{O}_4$ , $\text{ZrO}_2$      |
| H               | -5.28                   | -1.08                   | -2.78                  | -0.44                   | -5.40                   | $\text{La}_2\text{SeO}_2$ , $\text{La}_2\text{Zr}_2\text{O}_7$ , $\text{La}_4\text{Se}_3\text{O}_4$ , $\text{ZrO}_2$          |
| I               | -5.10                   | -1.09                   | -2.97                  | -0.42                   | -5.02                   | CdSe, $\text{La}_{10}\text{Se}_{14}\text{O}$ , $\text{La}_4\text{Se}_3\text{O}_4$ , $\text{ZrO}_2$                            |
| J               | -5.32                   | -1.09                   | -2.76                  | -0.42                   | -5.45                   | CdSe, $\text{La}_2\text{Zr}_2\text{O}_7$ , $\text{La}_4\text{Se}_3\text{O}_4$ , $\text{ZrO}_2$                                |
| K               | -6.19                   | -1.08                   | -1.87                  | -0.44                   | -7.69                   | $\text{La}_2\text{O}_3$ , $\text{La}_2\text{SeO}_2$ , $\text{La}_2\text{Zr}_2\text{O}_7$ , $\text{La}_4\text{Se}_3\text{O}_4$ |
| L (Anion rich)  | -6.23                   | -1.09                   | -1.84                  | -0.42                   | -7.74                   | CdSe, $\text{La}_2\text{O}_3$ , $\text{La}_2\text{Zr}_2\text{O}_7$ , $\text{La}_4\text{Se}_3\text{O}_4$                       |

**Table S18** Limits of the chemical potentials at which  $\text{La}_2\text{CdO}_2\text{Se}_2$  exists in the single phase in the La-Cd-O-Se-Al quinary system and the competing phases at respective limits. The unit of the chemical potential is eV.

| Conditions      | $\Delta\mu_{\text{La}}$ | $\Delta\mu_{\text{Cd}}$ | $\Delta\mu_{\text{O}}$ | $\Delta\mu_{\text{Se}}$ | $\Delta\mu_{\text{Al}}$ | Competing phases                                                                                                                  |
|-----------------|-------------------------|-------------------------|------------------------|-------------------------|-------------------------|-----------------------------------------------------------------------------------------------------------------------------------|
| A               | -3.62                   | 0                       | -3.91                  | -1.51                   | -2.13                   | $\text{Al}_2\text{O}_3$ , CdSe, LaAlO <sub>3</sub> , Cd                                                                           |
| B               | -3.59                   | 0                       | -3.93                  | -1.52                   | -2.10                   | $\text{Al}_2\text{O}_3$ , $\text{La}_2\text{SeO}_2$ , LaAlO <sub>3</sub> , Cd                                                     |
| C               | -4.60                   | 0                       | -2.93                  | -1.51                   | -4.12                   | CdSe, $\text{La}_2\text{O}_3$ , $\text{La}_4\text{Al}_2\text{O}_9$ , Cd                                                           |
| D               | -4.57                   | 0                       | -2.95                  | -1.52                   | -4.09                   | $\text{La}_2\text{O}_3$ , $\text{La}_2\text{SeO}_2$ , $\text{La}_4\text{Al}_2\text{O}_9$ , Cd                                     |
| E               | -4.54                   | 0                       | -2.99                  | -1.51                   | -3.96                   | CdSe, $\text{La}_4\text{Al}_2\text{O}_9$ , LaAlO <sub>3</sub> , Cd                                                                |
| F               | -4.51                   | 0                       | -3.01                  | -1.52                   | -3.94                   | $\text{La}_2\text{SeO}_2$ , $\text{La}_4\text{Al}_2\text{O}_9$ , LaAlO <sub>3</sub> , Cd                                          |
| G               | -3.47                   | 0                       | -4.06                  | -1.51                   | -1.90                   | $\text{Al}_2\text{O}_3$ , CdSe, $\text{La}_{10}\text{Se}_{14}\text{O}$ , Cd                                                       |
| H (Cation rich) | -3.45                   | 0                       | -4.07                  | -1.52                   | -1.89                   | $\text{Al}_2\text{O}_3$ , $\text{La}_{10}\text{Se}_{14}\text{O}$ , $\text{La}_2\text{SeO}_2$ , Cd                                 |
| I               | -5.08                   | -1.08                   | -2.99                  | -0.44                   | -3.52                   | $\text{Al}_2\text{O}_3$ , $\text{La}_{10}\text{Se}_{14}\text{O}$ , $\text{La}_2\text{SeO}_2$ , $\text{La}_4\text{Se}_3\text{O}_4$ |
| J               | -5.22                   | -1.08                   | -2.85                  | -0.44                   | -3.73                   | $\text{Al}_2\text{O}_3$ , $\text{La}_2\text{SeO}_2$ , $\text{La}_4\text{Se}_3\text{O}_4$ , LaAlO <sub>3</sub>                     |
| K               | -5.10                   | -1.09                   | -2.97                  | -0.42                   | -3.53                   | $\text{Al}_2\text{O}_3$ , CdSe, $\text{La}_{10}\text{Se}_{14}\text{O}$ , $\text{La}_4\text{Se}_3\text{O}_4$                       |
| L               | -5.25                   | -1.09                   | -2.82                  | -0.42                   | -3.76                   | $\text{Al}_2\text{O}_3$ , CdSe, $\text{La}_4\text{Se}_3\text{O}_4$ , LaAlO <sub>3</sub>                                           |
| M               | -6.19                   | -1.08                   | -1.87                  | -0.44                   | -5.71                   | $\text{La}_2\text{O}_3$ , $\text{La}_2\text{SeO}_2$ , $\text{La}_4\text{Al}_2\text{O}_9$ , $\text{La}_4\text{Se}_3\text{O}_4$     |
| N               | -6.13                   | -1.08                   | -1.93                  | -0.44                   | -5.56                   | $\text{La}_2\text{SeO}_2$ , $\text{La}_4\text{Al}_2\text{O}_9$ , $\text{La}_4\text{Se}_3\text{O}_4$ , LaAlO <sub>3</sub>          |
| O (Anion rich)  | -6.23                   | -1.09                   | -1.84                  | -0.42                   | -5.75                   | CdSe, $\text{La}_2\text{O}_3$ , $\text{La}_4\text{Al}_2\text{O}_9$ , $\text{La}_4\text{Se}_3\text{O}_4$                           |
| P               | -6.17                   | -1.09                   | -1.90                  | -0.42                   | -5.60                   | CdSe, $\text{La}_4\text{Al}_2\text{O}_9$ , $\text{La}_4\text{Se}_3\text{O}_4$ , LaAlO <sub>3</sub>                                |

**Table S19** Limits of the chemical potentials at which  $\text{La}_2\text{CdO}_2\text{Se}_2$  exists in the single phase in the La-Cd-O-Se-Sr quinary system and the competing phases at respective limits. The unit of the chemical potential is eV.

| Conditions      | $\Delta\mu_{\text{La}}$ | $\Delta\mu_{\text{Cd}}$ | $\Delta\mu_{\text{O}}$ | $\Delta\mu_{\text{Se}}$ | $\Delta\mu_{\text{Sr}}$ | Competing phases                                                                                                                       |
|-----------------|-------------------------|-------------------------|------------------------|-------------------------|-------------------------|----------------------------------------------------------------------------------------------------------------------------------------|
| A (Anion rich)  | -6.23                   | -1.09                   | -1.84                  | -0.42                   | -4.10                   | CdSe, $\text{La}_2\text{O}_3$ , $\text{La}_4\text{Se}_3\text{O}_4$ , SrSe                                                              |
| B               | -6.19                   | -1.08                   | -1.87                  | -0.44                   | -4.08                   | $\text{La}_2\text{O}_3$ , $\text{La}_2\text{SeO}_2$ , $\text{La}_4\text{Se}_3\text{O}_4$ , SrSe                                        |
| C               | -4.60                   | 0                       | -2.93                  | -1.51                   | -3.01                   | CdSe, $\text{La}_2\text{O}_3$ , SrSe, Cd                                                                                               |
| D               | -4.57                   | 0                       | -2.95                  | -1.52                   | -3.00                   | $\text{La}_2\text{O}_3$ , $\text{La}_2\text{SeO}_2$ , SrSe, Cd                                                                         |
| E               | -5.11                   | -1.09                   | -2.96                  | -0.42                   | -4.10                   | CdSe, $\text{La}_4\text{Se}_3\text{O}_4$ , $\text{Sr}(\text{LaSe}_2)_2$ , SrSe                                                         |
| F               | -5.09                   | -1.08                   | -2.97                  | -0.44                   | -4.08                   | $\text{La}_2\text{SeO}_2$ , $\text{La}_4\text{Se}_3\text{O}_4$ , $\text{Sr}(\text{LaSe}_2)_2$ , SrSe                                   |
| G               | -3.48                   | 0                       | -4.05                  | -1.51                   | -3.01                   | CdSe, $\text{Sr}(\text{LaSe}_2)_2$ , SrSe, Cd                                                                                          |
| H               | -3.47                   | 0                       | -4.05                  | -1.52                   | -3.00                   | $\text{La}_2\text{SeO}_2$ , $\text{Sr}(\text{LaSe}_2)_2$ , SrSe, Cd                                                                    |
| I               | -5.08                   | -1.08                   | -2.99                  | -0.44                   | -4.11                   | $\text{La}_{10}\text{Se}_{14}\text{O}$ , $\text{La}_2\text{SeO}_2$ , $\text{La}_4\text{Se}_3\text{O}_4$ , $\text{Sr}(\text{LaSe}_2)_2$ |
| J               | -5.10                   | -1.09                   | -2.97                  | -0.42                   | -4.12                   | CdSe, $\text{La}_{10}\text{Se}_{14}\text{O}$ , $\text{La}_4\text{Se}_3\text{O}_4$ , $\text{Sr}(\text{LaSe}_2)_2$                       |
| K (Cation rich) | -3.45                   | 0                       | -4.07                  | -1.52                   | -3.02                   | $\text{La}_{10}\text{Se}_{14}\text{O}$ , $\text{La}_2\text{SeO}_2$ , $\text{Sr}(\text{LaSe}_2)_2$ , Cd                                 |
| L               | -3.47                   | 0                       | -4.06                  | -1.51                   | -3.03                   | CdSe, $\text{La}_{10}\text{Se}_{14}\text{O}$ , $\text{Sr}(\text{LaSe}_2)_2$ , Cd                                                       |

**Table S20** Limits of the chemical potentials at which  $\text{La}_2\text{CdO}_2\text{Se}_2$  exists in the single phase in the La-Cd-O-Se-Na quinary system and the competing phases at respective limits. The unit of the chemical potential is eV.

| Conditions      | $\Delta\mu_{\text{La}}$ | $\Delta\mu_{\text{Cd}}$ | $\Delta\mu_{\text{O}}$ | $\Delta\mu_{\text{Se}}$ | $\Delta\mu_{\text{Na}}$ | Competing phases                                                                                                               |
|-----------------|-------------------------|-------------------------|------------------------|-------------------------|-------------------------|--------------------------------------------------------------------------------------------------------------------------------|
| A (Anion rich)  | -6.23                   | -1.09                   | -1.84                  | -0.42                   | -1.63                   | CdSe, $\text{La}_2\text{O}_3$ , $\text{La}_4\text{Se}_3\text{O}_4$ , $\text{Na}_4\text{Cd}_3\text{Se}_5$                       |
| B               | -6.19                   | -1.08                   | -1.87                  | -0.44                   | -1.61                   | $\text{La}_2\text{O}_3$ , $\text{La}_2\text{SeO}_2$ , $\text{La}_4\text{Se}_3\text{O}_4$ , $\text{Na}_4\text{Cd}_3\text{Se}_5$ |
| C               | -4.60                   | 0                       | -2.93                  | -1.51                   | -1.08                   | CdSe, $\text{La}_2\text{O}_3$ , $\text{Na}_4\text{Cd}_3\text{Se}_5$ , Cd                                                       |
| D               | -4.57                   | 0                       | -2.95                  | -1.52                   | -1.07                   | $\text{La}_2\text{O}_3$ , $\text{La}_2\text{SeO}_2$ , $\text{Na}_4\text{Cd}_3\text{Se}_5$ , Cd                                 |
| E               | -5.36                   | -1.09                   | -2.71                  | -0.42                   | -1.63                   | CdSe, $\text{La}_4\text{Se}_3\text{O}_4$ , $\text{Na}_4\text{Cd}_3\text{Se}_5$ , NaLaSe <sub>2</sub>                           |
| F               | -5.34                   | -1.08                   | -2.72                  | -0.44                   | -1.61                   | $\text{La}_2\text{SeO}_2$ , $\text{La}_4\text{Se}_3\text{O}_4$ , $\text{Na}_4\text{Cd}_3\text{Se}_5$ , NaLaSe <sub>2</sub>     |
| G               | -3.73                   | 0                       | -3.80                  | -1.51                   | -1.08                   | CdSe, $\text{Na}_4\text{Cd}_3\text{Se}_5$ , NaLaSe <sub>2</sub> , Cd                                                           |
| H               | -3.72                   | 0                       | -3.80                  | -1.52                   | -1.07                   | $\text{La}_2\text{SeO}_2$ , $\text{Na}_4\text{Cd}_3\text{Se}_5$ , NaLaSe <sub>2</sub> , Cd                                     |
| I               | -5.08                   | -1.08                   | -2.99                  | -0.44                   | -1.88                   | $\text{La}_{10}\text{Se}_{14}\text{O}$ , $\text{La}_2\text{SeO}_2$ , $\text{La}_4\text{Se}_3\text{O}_4$ , NaLaSe <sub>2</sub>  |
| J (Cation rich) | -3.45                   | 0                       | -4.07                  | -1.52                   | -1.34                   | $\text{La}_{10}\text{Se}_{14}\text{O}$ , $\text{La}_2\text{SeO}_2$ , NaLaSe <sub>2</sub> , Cd                                  |
| K               | -5.10                   | -1.09                   | -2.97                  | -0.42                   | -1.89                   | CdSe, $\text{La}_{10}\text{Se}_{14}\text{O}$ , $\text{La}_4\text{Se}_3\text{O}_4$ , NaLaSe <sub>2</sub>                        |
| L               | -3.47                   | 0                       | -4.06                  | -1.51                   | -1.34                   | CdSe, $\text{La}_{10}\text{Se}_{14}\text{O}$ , NaLaSe <sub>2</sub> , Cd                                                        |

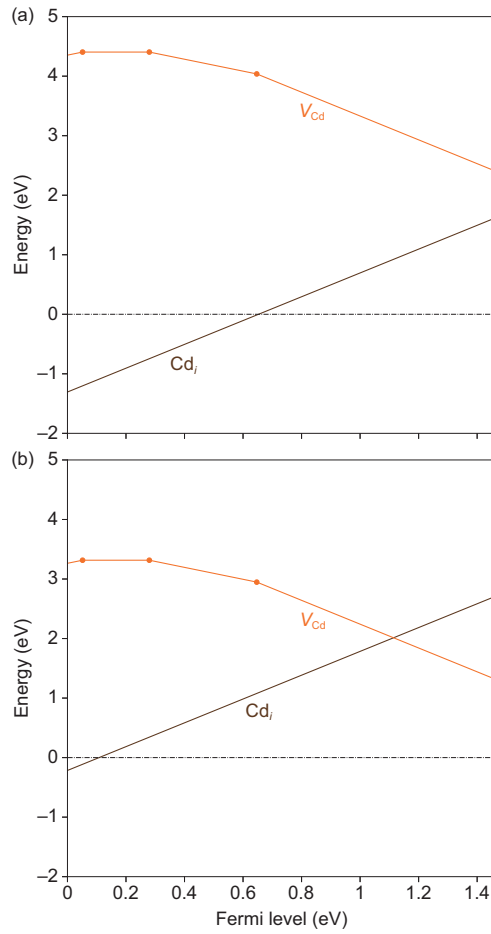

**Fig. S2** Formation energies of  $V_{Cd}$  and  $Cd_i$  in zb-CdSe at (a) cation-rich ( $\Delta\mu_{Cd} = 0$  eV) and (b) anion-rich ( $\Delta\mu_{Cd} = -1.09$  eV) conditions.
